# Supplementary material for: Molecular Phylogenies indicate a Paleo-Tibetan Origin of Himalayan Lazy Toads (Scutiger)
Source: PubMed Central journal article supplement (PMC5468327; doi:10.1038/s41598-017-03395-4), 2017-06-12
Supplement: 41598_2017_3395_MOESM1_ESM.pdf [file 41598_2017_3395_MOESM1_ESM.pdf]

## Supplementary Information

### Molecular Phylogenies indicate a Paleo-Tibetan Origin of Himalayan Lazy Toads

(*Scutiger*)

Sylvia Hofmann, Matthias Stöck, Yuchi Zheng, Francesco Gentile Ficetola, Jia-Tang Li,

Ulrich Scheidt, Joachim Schmidt

#### Supplementary information S1

The collision of the continental plates of India and Eurasia was the major geological process that initiated the formation of the Himalaya and the ultimate uplift of the Tibetan Plateau. Although various lines of geoscientific and biogeographic evidence have suggested different uplifting scenarios for the Himalaya-Tibet orogen, the time of the onset of the orogeny, approximately  $45\pm 5$  Mya, is widely accepted (for review:<sup>1-5</sup>). However, translating evidence for this uplift into paleo-elevations has barely been achieved and thus could hardly be applied to biogeographical studies<sup>6</sup>. Many studies suggest a highly elevated terrain in the region of today's southern Tibet and a multi-stage collision history, e.g. with a “soft” (micro)continent–continent collision in the early Eocene and a “hard” India–Eurasia collision that happened at  $\sim 25$ – $20$  Mya or earlier<sup>2,3,7-12</sup>. Accordingly, this terrain was uplifted due to significant pre-collisional crustal thickening and has characterized the physiography of the southern margin of Asia from at least 45 Mya (see<sup>1-3,5,10</sup> and references therein), probably forming an Andean-type volcanic mountain chain<sup>13-15</sup>. With the continued continent-continent (hard)<sup>7</sup> collision, the uplift expanded mainly northwards and eastwards. Regardless, which model of collision is assumed, the topography of the Greater Himalaya has obviously arisen subsequently to that of southern Tibet<sup>16</sup> during the post-Eocene at the earliest, possibly even during a more recent period ( $\sim 20$ – $10$  Mya)<sup>11,17,18</sup>. Although important questions remain regarding the spatio-temporal distribution of regions with certain altitudes in the course of the Himalaya-Tibet orogen evolution, the latter point seems of particular interest for biogeographers, who try to understand the distributional history of Himalayan biota, as addressed in the present paper.

#### Supplementary information S2

Among lazy toads, *Scutiger boulengeri* (Bedriaga, 1898) has the widest known distribution, spanning along the northern slope of the Himalaya, from northern central Nepal<sup>19</sup> through the southern and eastern parts of the Tibet to the Qinghai, Gansu and Sichuan Provinces in W-China<sup>20</sup>. A detailed account of *S. boulengeri* has recently also provided from the Gurudongmar Lake, likewise located on the northern slope of the Himalaya, close to the Indo-Tibetan border<sup>21</sup>. Several species records, e.g. available from GBIF.org, have to be critically reviewed and potentially revised<sup>22-24</sup>. Given the substantial morphological variation and cryptic genetic diversity within the genus *Scutiger* (e.g., within *S. boulengeri*<sup>25</sup>), a verification of the species identification by detailed morphological and/or

molecular analyses seems mandatory in this group. Therefore, we included in our species map (Fig. 1) only the type localities (as far as geo-referencing was possible) and records that have been genetically verified.

As yet, only a few nominal species have been described from the southern slope of the Himalayan range, namely *S. nepalensis* Dubois, 1974, *S. sikkimensis* (Blyth, 1855) and *S. occidentalis* Dubois, 1978 (up to now considered a junior subjective synonym of *S. nyingchiensis* Fei, 1977, which is only known from counties in the south-east of Tibet and from North India<sup>26,27</sup>). Moreover, *S. spinosus* and *S. wuguanfui* have been recently described and show a distribution at the southern side of the Himalaya<sup>28,29</sup>. For the sake of completeness, *Scutigera bhutanensis* should be considered as Himalayan species, although it is known only from the imprecise type locality, "Bhutan", without additional information<sup>30</sup>.

## References

- Lippert, P. C., van Hinsbergen, D. J. J. & Dupont-Nivet, G. Early Cretaceous to present latitude of the central proto-Tibetan Plateau: A paleomagnetic synthesis with implications for Cenozoic tectonics, paleogeography, and climate of Asia. *Geological Society of America, Special Papers* **507** (2014).
- Gibbons, A. D., Zahirovic, S., Müller, R. D., Whittaker, J. M. & Yatheesh, V. A tectonic model reconciling evidence for the collisions between India, Eurasia and intra-oceanic arcs of the central-eastern Tethys. *Gondwana Research* **28**, 451–492 (2015).
- Li, Y. *et al.* Propagation of the deformation and growth of the Tibetan–Himalayan orogen: A review. *Earth-Science Reviews* **143**, 36–61 (2015).
- Molnar, P., Boos, W. R. & Battasti, D. S. Orographic Controls on Climate and Paleoclimate of Asia: Thermal and Mechanical Roles for the Tibetan Plateau. *Annual Review of Earth and Planetary Sciences* **38**, 77–102 (2010).
- Renner, S. S. Available data point to a 4-km-high Tibetan Plateau by 40Ma, but 100 molecular-clock papers have linked supposed recent uplift to young node ages. *Journal of Biogeography* **43**, 1479–1487 (2016).
- Schmidt, J., Opgenoorth, L. & Miehle, G. Speciation, uplift, and climate change in *Nepal*. *An introduction to the natural history, ecology and human environment in the Himalayas. A companion to the Flora of Nepal* (eds G. Miehle & C. Pendry) 168–173 (Royal Botanic Garden Edinburgh, 2016).
- van Hinsbergen, D. J. *et al.* Greater India Basin hypothesis and a two-stage Cenozoic collision between India and Asia. *Proc Natl Acad Sci U S A* **109**, 7659–7664 (2012).
- Matthews, K. J., Müller, R. D. & Sandwell, D. T. Oceanic microplate formation records the onset of India–Eurasia collision. *Earth and Planetary Science Letters* **433**, 204–214 (2016).
- Ma, Y. *et al.* Early Cretaceous paleomagnetic and geochronologic results from the Tethyan Himalaya: Insights into the Neotethyan paleogeography and the India-Asia collision. *Scientific reports* **6**, 21605 (2016).
- Hetzl, R. *et al.* Peneplain formation in southern Tibet predates the India-Asia collision and plateau uplift. *Geology* **39**, 983–986 (2011).
- Wang, C. *et al.* Constraints on the early uplift history of the Tibetan Plateau. *Proceedings of the National Academy of Sciences* **105**, 4987–4992 (2008).
- Rowley, D. B. & Currie, B. S. Palaeo-altimetry of the late Eocene to Miocene Lunpola basin, central Tibet. *Nature* **439**, 677–681 (2006).
- Ding, L. *et al.* The Andean-type Gangdese Mountains: Paleoelevation record from the Paleocene–Eocene Linzhou Basin. *Earth and Planetary Science Letters* **392**, 250–264 (2014).
- Tada, R., Zheng, H. & Cliff, D. Evolution and variability of the Asian monsoon and its potential linkage with uplift of the Himalaya and Tibetan Plateau. *Progress in Earth and Planetary Science* **3**, 1–26 (2016).
- Royden, L., Burchfiel, B. C. & van der Hilst, R. D. The Geological Evolution of the Tibetan Plateau. *Science* **321**, 1054–1058 (2008).
- Rowley, D. B. & Garzione, C. N. Stable Isotope-Based Paleoaltimetry. *Annual Review of Earth and Planetary Sciences* **35**, 463–508 (2007).
- Tremblay, M. M. *et al.* Erosion in southern Tibet shut down at approximately 10 Ma due to enhanced rock uplift within the Himalaya. *Proceedings of the National Academy of Sciences* **112**, 12030–12035 (2015).

- 18 Clift, P. D. *et al.* Correlation of Himalayan exhumation rates and Asian monsoon intensity. *Nature Geoscience* **1**, 875–880 (2008).
- 19 Schleich, H. H. & Kästle, W. *Amphibians and Reptiles of Nepal*. (A.R.G. Gantner Verlag, 2002).
- 20 Frost, D. R. *Amphibian species of the world: an online reference. Version 5.2 (15 July 2008). Electronic Database*, <<http://research.amnh.org/herpetology/amphibia/index.php>> (2008).
- 21 Subba, B., Ravikanth, G. & Aravind, N. A. Scaling new heights: first record of Boulenger's Lazy Toad *Scutiger boulengeri* (Amphibia: Anura: Megophryidae) from high altitude lake in Sikkim Himalaya, India. *Journal of Threatened Taxa* **7**, 7655–7663 (2015).
- 22 Hjarding, A., Tolley, K. A. & Burgess, N. D. Red List assessments of East African chameleons: a case study of why we need experts. *Oryx*, 1–7 (2014).
- 23 Newbold, T. Applications and limitations of museum data for conservation and ecology, with particular attention to species distribution models. *Progress in Physical Geography* **34**, 3–22 (2010).
- 24 Graham, C. H., Ferrier, S., Huettman, F., Moritz, C. & Peterson, A. T. New developments in museum-based informatics and applications in biodiversity analysis. *Trends in Ecology and Evolution* **19**, 497–503 (2004).
- 25 Chen, W., Bi, K. & Fu, J. Frequent mitochondrial gene introgression among high elevation Tibetan megophryid frogs revealed by conflicting gene genealogies. *Mol Ecol* **18**, 2856–2876 (2009).
- 26 Dubois, A. *Miscellanea taxinomica batrachologica* (I). *Alytes* **5**, 19 (1987).
- 27 Sarania, B., Kumar, A., Wang, K. & Rakshit, K. A record of *Scutiger nyingchiensis* Fei, 1977 (Amphibia: Anura: Megophryidae) in the Eastern Himalaya, North East India. *Current Science India* **109**, 413–414 (2015).
- 28 Jiang, K. *et al.* A new species of the genus *Scutiger* (Anura: Megophryidae) from southeastern Tibet, China. *Zootaxa* **3388**, 29–40 (2012).
- 29 Jiang, K. *et al.* A new species of the genus *Scutiger* (Anura: Megophryidae) from Medog of southeastern Tibet, China. *Zoological Research* **37**, 21–30 (2016).
- 30 Delorme, M. & Dubois, A. Une nouvelle espèce de *Scutiger* du Bhutan, et quelques remarques sur la classification subgénérique du genre *Scutiger* (Megophryidae, Leptobrachiinae). *Alytes* **19**, 141–153 (2001).

## Supplementary Information S3

### *Scutigera occidentalis* Dubois, 1978

**Type locality:** "un torrent sous le village de Shukdhari, 2920-2940 m, près de Sonamarg, Cachemire" (i.e. "a stream below the village Shukdhari, 2920-2940 m a.s.l., near Sonamarg, Kashmir"), Jammu and Kashmir, India.

**Holotype:** MNHNP 1977.1069, by original designation (Dubois, 1978).

According to "Lost Species of India" (<http://www.lostspeciesindia.org/LAI2/wanted.php>) this species has been last seen in India 1977, i.e. from the original description based on 89 specimens. According to Dubois (1978), prior to its description, this taxon has been reported under different scientific names by several authors. Our genetic data from the Deosai Plateau (W-Kashmir, Pakistan) provide evidence that this taxon is a valid species and does not present a junior subjective synonym of *Scutigera nyingchiensis* Fei, 1977, as Dubois (1980, 1987) suggested. Here, we summarize known facts and provide new information on morphological characters and the currently known range of *S. occidentalis*. Figure S3.1 presents defined records for *S. occidentalis* as reported by Dubois (1978), Ficetola et al. (2010), and in the present study. However, note that some of the historic records might be doubtful. As mentioned in the main text, Ficetola in 2006 (Ficetola et al. 2010) and Stöck in 2008 (unpublished, Fig. S3.2) independently found *S. occidentalis* on the Deosai Plateau.

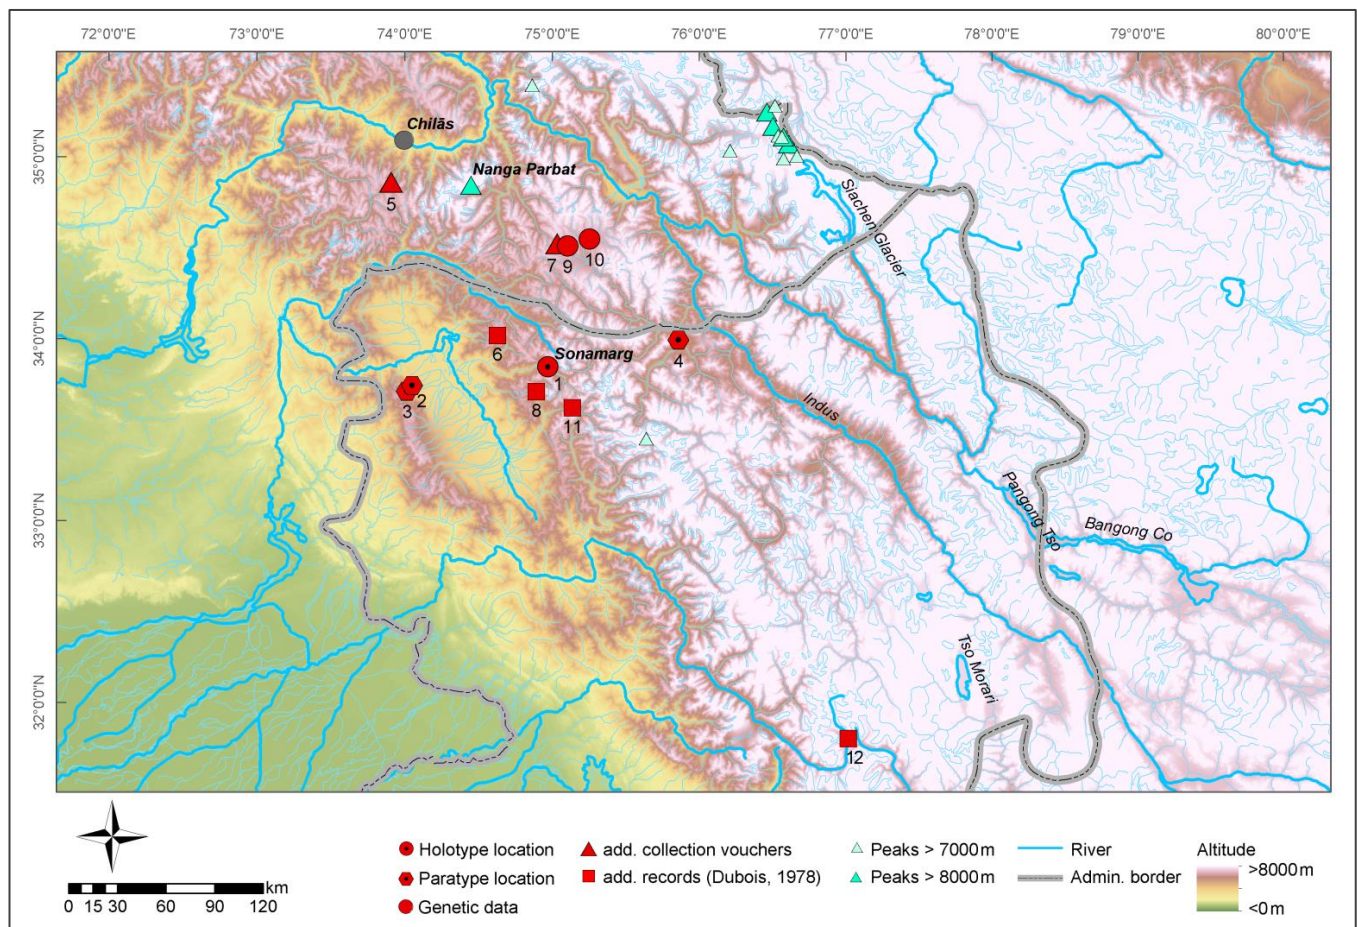

**Fig. S3.1. Records of *Scutigera occidentalis*.** Apart from the holotype's and paratypes' locations (nos. 1 and 2-4) additional (add.) records, listed in Dubois (1978) or available from collection vouchers, are included. Localities nos. 9 and 10 refer to the records of Ficetola (2010) and Stöck (unpubl.), genetically characterized by the present study; Table S3.1 for details. The map was created using ArcMap 10.3.1 (<https://www.esri.com/>).

**Table S3.1. Records of *Scutigera (cf.) occidentalis* as shown in Fig. S3.1.** Most coordinates (\*) are approximations from verbal descriptions in the original publications. Coordinates are given in decimal degree to match with the format of the original records (9 and 10).

| No  | long    | lat     | Altitude  | Country                  | Taxon                      | Leg./Reference                                          | Sample-ID/Museum Vouchers                 | Comment                                            | Description of Location                    |
|-----|---------|---------|-----------|--------------------------|----------------------------|---------------------------------------------------------|-------------------------------------------|----------------------------------------------------|--------------------------------------------|
| *1  | 75.29   | 34.30   | 2920-2940 | Jammu Kashmir            | <i>S. occidentalis</i>     | Dubois & Vidal (Dubois 1978)                            | MNHN 1977.1069                            | holotype                                           | Sonamarg, Cashmer (Jammu & Cashmer, India) |
| *2  | 74.37   | 34.04   | 2680-2850 | Kashmir                  | <i>S. occidentalis</i>     | Dubois & Vidal (Dubois 1978)                            | MNHN 1977.1129-1144                       | paratype                                           | between Gulmarg and Khilanmarg, Cashmer    |
| *3  | 74.38   | 34.04   | 2690      | Kashmir                  | <i>S. occidentalis</i>     | Dubois & Vidal (Dubois 1978)                            | MNHN 1977.1145                            | paratype                                           | Gulmarg, Cashmer                           |
| *4  | 76.13   | 34.55   | 3660      | Ladakh                   | <i>S. cf. occidentalis</i> | Boulenger, reference: Duda & Sahi (1977), (Dubois 1978) | BMNH 1919.8.11.44                         | as <i>Cophophryne sikkimensis</i>                  | Kargil, Ladakh                             |
| *5  | 74.04   | 35.18   | ?         | Pakistan                 | <i>S. occidentalis</i>     | Auffenberg & Rehman                                     | FLMNH 82455, 82456, 82394 to 82407, 82409 | museum vouchers                                    | 4.2 km N Babusar, 30.7 km S Chilās         |
| *6  | 74.92   | 34.43   | 3570      | Jammu Kashmir            | <i>S. cf. occidentalis</i> | Annandale 1917, (Dubois 1978)                           |                                           | considered <i>S. occidentalis</i> by Dubois (1978) | Gangbal Lake                               |
| *7  | 75.22   | 34.98   | ?         | Pakistan                 | <i>S. occidentalis</i>     | Shamin, Fakhri                                          | FLMNH 84663 to 84667                      | museum vouchers                                    | Deosai Plateau, Sheosar Lake, SW side      |
| *8  | 75.23   | 34.15   | 2740      | Kashmir                  | <i>S. cf. occidentalis</i> | Annandale 1917 (Dubois 1978)                            |                                           | considered <i>S. occidentalis</i> by Dubois (1978) | Lidarwart                                  |
| 9   | 75.3000 | 34.9833 | 4300      | Pakistan                 | <i>S. occidentalis</i>     | Ficetola in 2006 (Ficetola et al. 2010)                 | MS_PK1-5                                  | genetic data, photo vouchers                       | Pakistan, Deosai Plateau                   |
| 10  | 75.4400 | 35.0400 | 4300      | Pakistan                 | <i>S. occidentalis</i>     | Stöck in 2008 (this study)                              | MS_PK6                                    | genetic data, photo vouchers                       | Pakistan, Deosai Plateau                   |
| *11 | 75.4971 | 34.0943 | 3660      | India                    | <i>S. cf. occidentalis</i> | Ahmad 1946 (Dubois 1978)                                | -                                         | considered <i>S. occidentalis</i> by Dubois (1978) | Shesh Nag lake                             |
| *12 | 77.6171 | 32.4752 | 3900      | Himachal Pradesh (India) | <i>S. cf. occidentalis</i> | Ahmad 1946 (Dubois 1978)                                | -                                         | considered <i>S. occidentalis</i> by Dubois (1978) | Chandra Sar Lake                           |
| -   |         |         | 3050-3200 | no details provided      | <i>S. cf. occidentalis</i> | Annandale 1917 (Dubois 1978)                            | -                                         | considered <i>S. occidentalis</i> by Dubois (1978) | Nagabera                                   |
| -   |         |         | 3680      | no details provided      | <i>S. cf. occidentalis</i> | Annandale 1917 (Dubois 1978)                            | -                                         | considered <i>S. occidentalis</i> by Dubois (1978) | Kreshen Sar Lake                           |

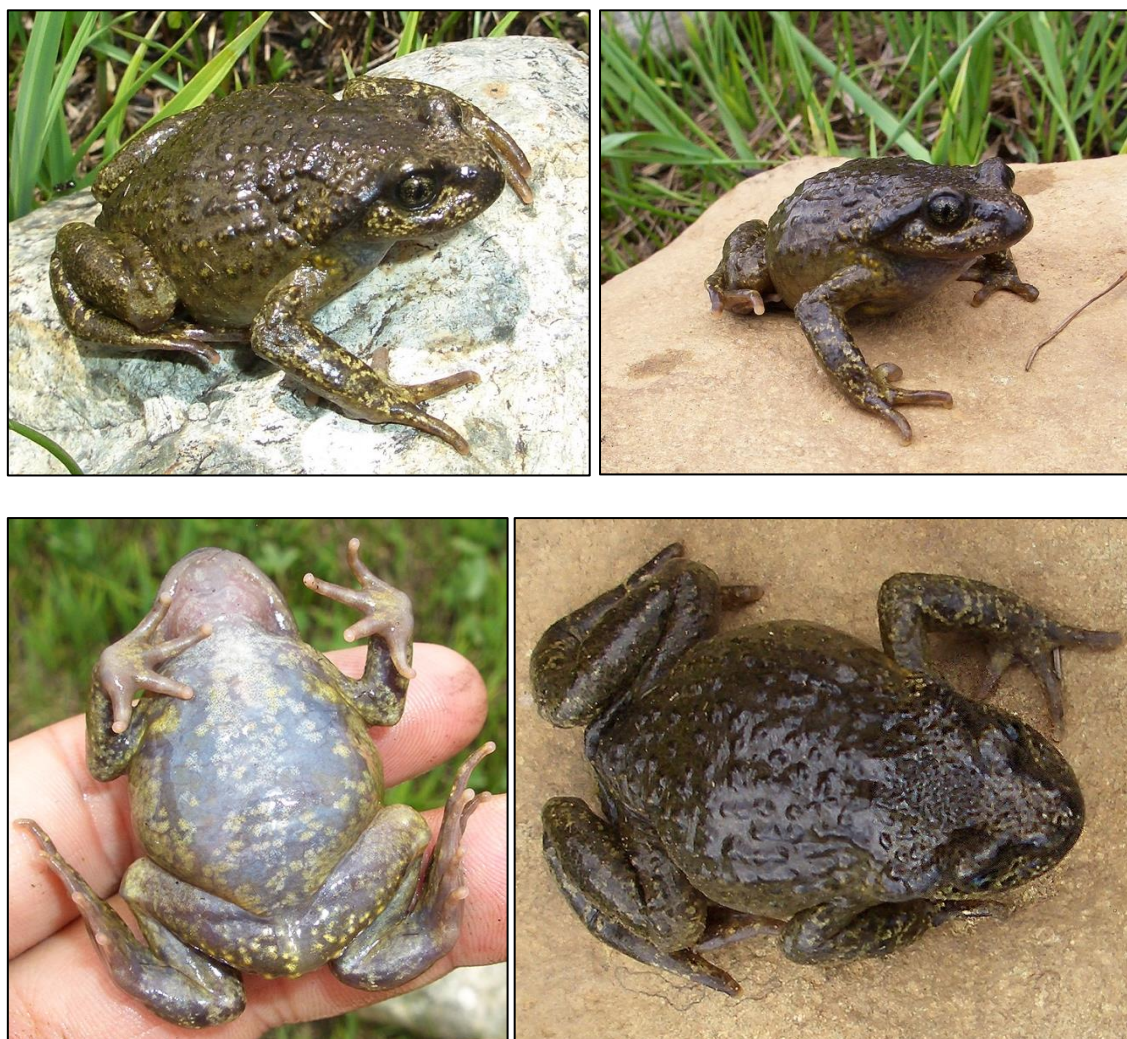

**Fig. S3.2. Photo vouchers of *Scutigera occidentalis*** (presumably a female, sample ID: MS\_PK6) from the present study, sampled for DNA (buccal swabs) on the Deosai Plateau, 4300 m a.s.l., in 2008 (Photographs: M. Stöck).

Here, we further report on two other series of scientific vouchers that we have recently located in the Division of Herpetology of the Florida Museum of Natural History. One large series of specimens (FLMNH 82455, 82456, 82394 to 82407, 82409) represents differently aged specimens, reaching from 15 mm to 65 mm snout-vent-length, and essentially comprises the currently most western known records of *S. occidentalis* from locality no. 5 in Fig. S3.1 (4.2 km N of Babusar, 30.7 km S of Chilas, Pakistan), collected by W. Auffenberg and H. Rehman in 1991. This record exceeds the known range to the SW of the Nanga Parbat Massif. Another series from the FLMNH (84663 to 84667) were collected by F. Shamin from the southwest of the Deosai Plateau (Sheosar Lake), from locality no. 7 in Fig. S3.1.

We depict both series in part in Figs. S3.3 and S3.4. They exemplify that this species belongs to the large *Scutigera* species and gives an impression of the morphological variation of the taxon. Although the nuptial pads on the chests of mature male *Scutigera* have been repeatedly used as species-specific characters (e.g. Dubois 1978: Fig. 3d), their variability may be considerable: as an example, we depict them from two males (FLMNH 82396 and 82402), collected from the same locality.

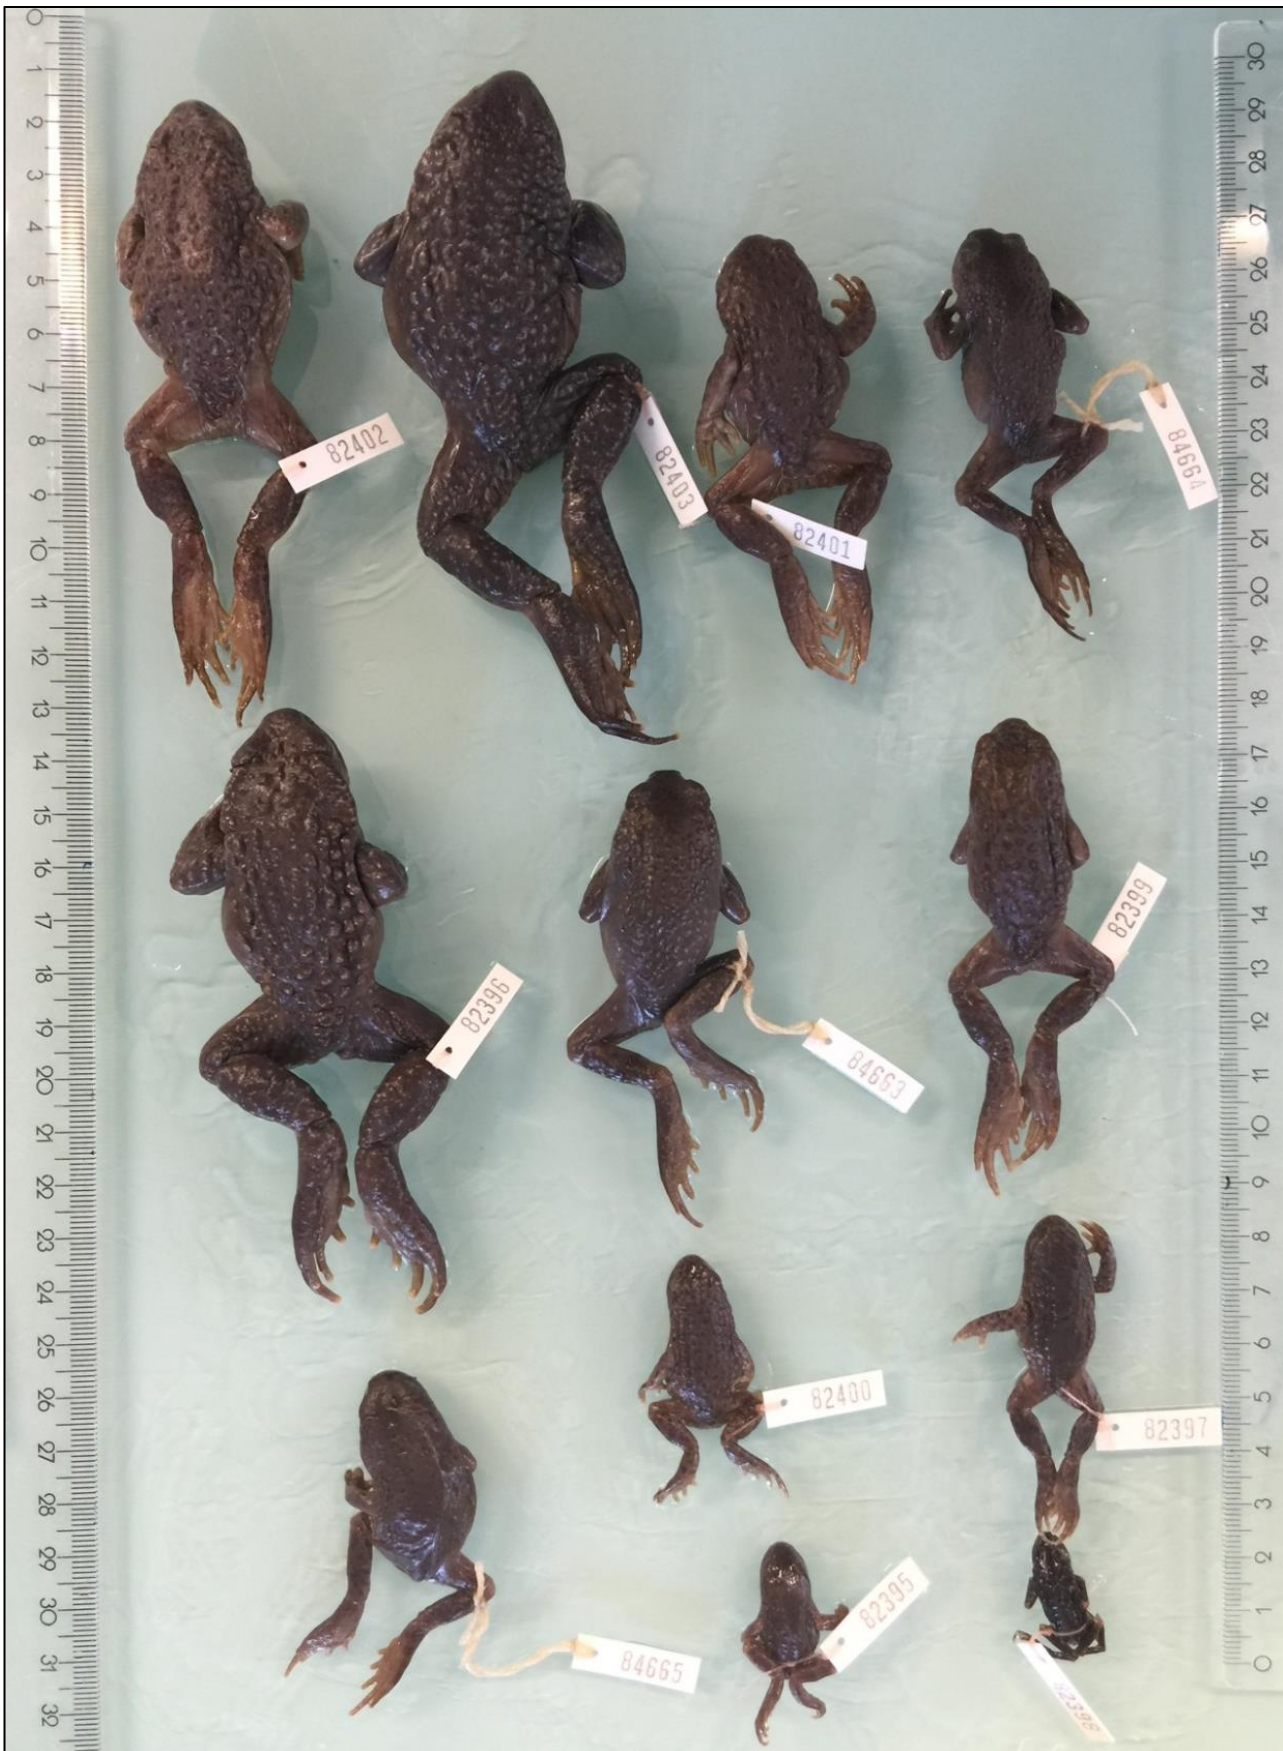

**Fig. S3.3.** Dorsal view of specimens collected from the FLMNH, see text for details (Photograph: M. Stöck).

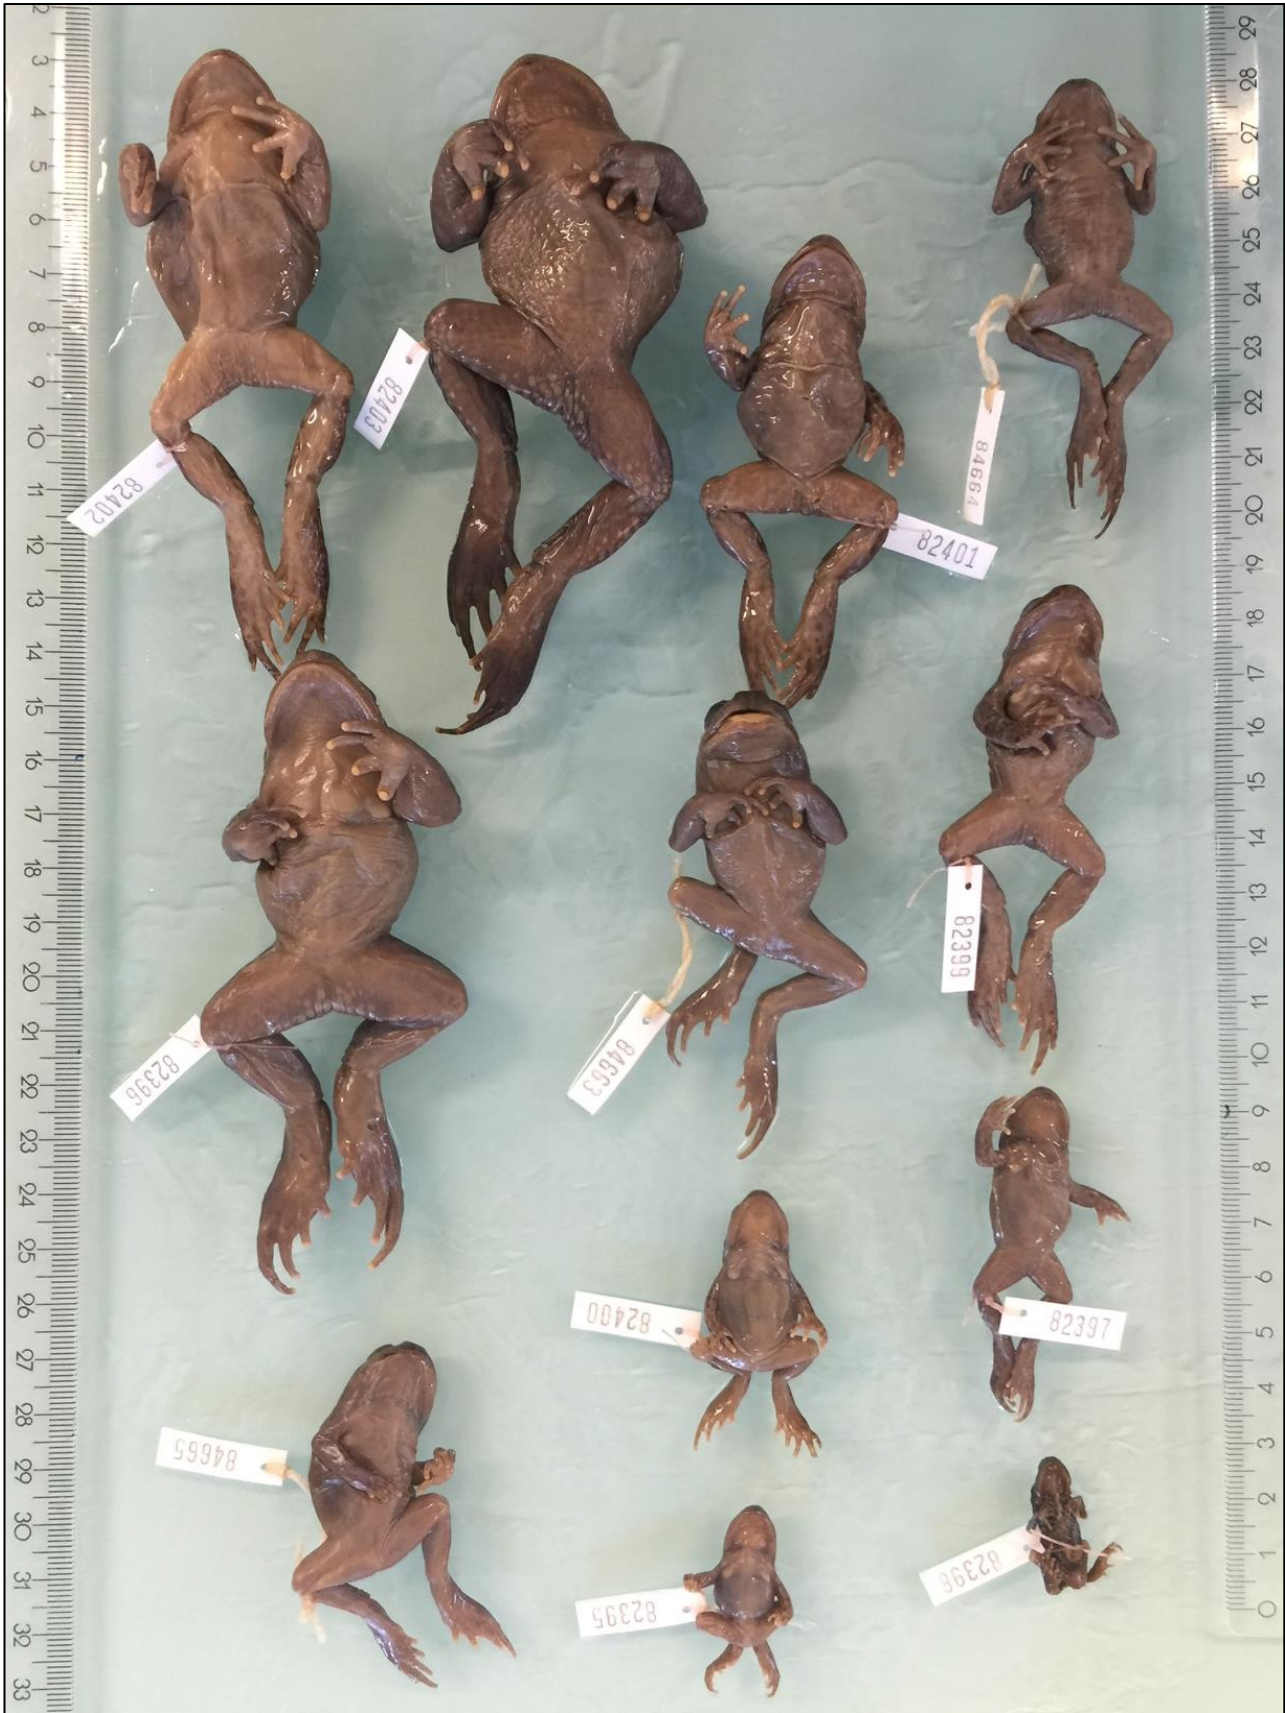

Fig. S3.4. Ventral view of specimens of *Scutigera occidentalis* collected from the FLMNH, see text for details (Photograph: M. Stöck).



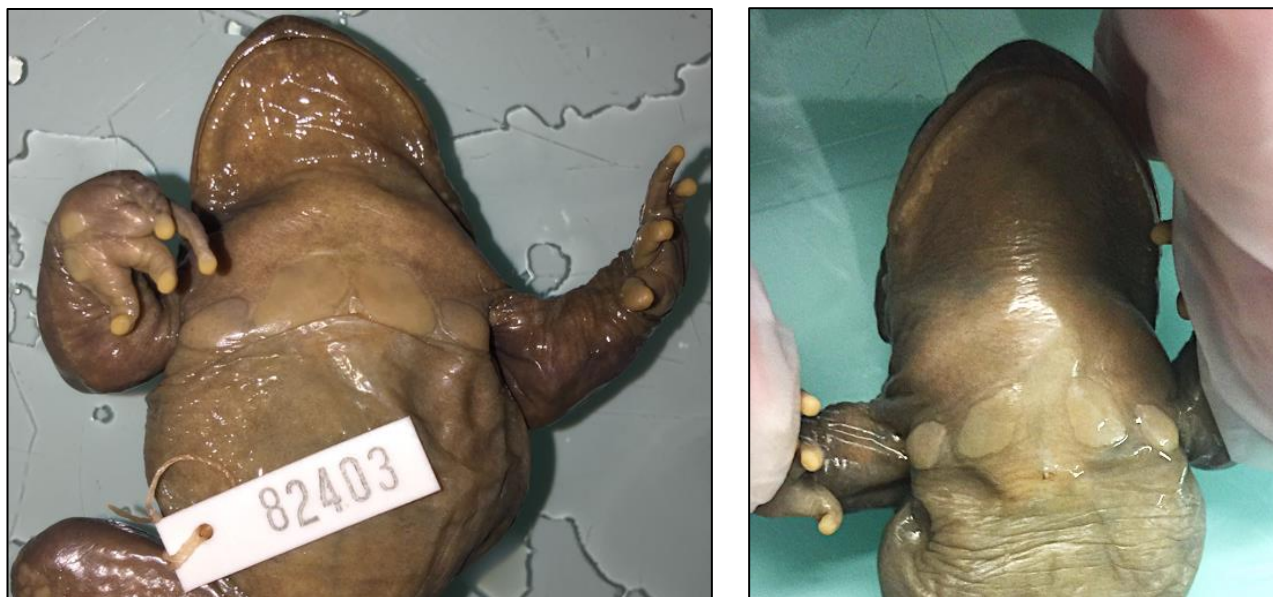

**Fig. S3.5.** Nuptial pads of two males (left: FLMNH 82403; right: FLMNH 82396) of *S. occidentalis*, out of breeding season. Specimens were collected from the same locality no. 5 in Fig. S3.1 (4.2 km N of Babusar, 30.7 km S of Chilas, Pakistan), by W. Auffenberg and H. Rehman in 1991.

#### The possibly only known-to-science tadpole

To our knowledge, the tadpoles of *S. occidentalis* have not been known to science through any previous publication. Among the series of specimens, Auffenberg & Rahman collected on 9/9/1991 “under stones in a weed-choked small stream in a wet meadow” at locality no. 5 in Fig. S3.1 (4.2 km N of Babusar, 30.7 km S of Chilas, Pakistan), is an about 70 mm long tadpole (FLMNH 82394). Its oral disc is depicted in Fig. S3.6. Its species identification appears correct since the only other anuran species in this region and elevation belong to members of the *Bufo viridis* subgroup (Stöck et al. 2006) are distinguished by a different oral disc morphology.

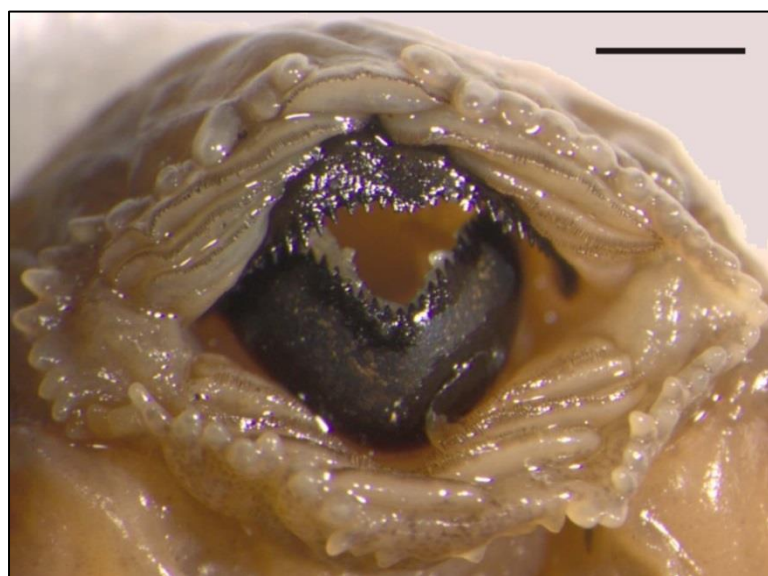

**Fig. S3.6.** The oral disc and mouth of a fixed tadpole of *Scutiger occidentalis*. Shown is specimen FLMNH 82394, collected by Auffenberg & Rahman, 9/9/1991, total length about 70 mm. The bar represents 1 mm. Photograph: M. Stöck.

## References

- Dubois, A. Une espèce des *Scutigera* Theobald, 1868 de l'Himalaya occidental (Anura: Pelobatidae). *Senckenbergiana biologica* **59**, 163–171 (1978).
- Dubois, A. Notes sur la systematique et la repartition des amphibiens anoures de Chine et des regions avoisinantes IV. Classification generique et subgenerique des Pelobatidae, Megophryinae. *Bulletin Mensuel de la Société Linnéenne de Lyon* **49**, 469–482 (1980).
- Dubois, A. *Miscellanea taxinomica batrachologica* (I). *Alytes*. Paris 5: 7–95 (1987; "1986").
- Fei, L. A survey of amphibians in Xizang (Tibet). *Acta Zoologica Sinica/ Dong wu xue bao*, Beijing **23**, 54–63 (1977).
- Ficetola, G. F., A. Crottini, M. Casiraghi, and E. Padoa-Schioppa. New data on amphibians and reptiles of the Northern Areas of Pakistan: distribution, genetic variability and conservation issues. *North-Western Journal of Zoology*, Oradea, Romania **6**, 1–12 (2010).
- Stöck, M., Moritz, C., Hickerson, M., Frynt, a D., Dujsebayaeva T., Eremchenko, V., Macey, J.R., Papenfuss, T. J. & Wake, D. B. (2006): Evolution of mitochondrial relationships and biogeography of Palearctic green toads (*Bufo viridis* subgroup) with insights in their genomic plasticity. *Molecular Phylogenetics and Evolution* **41**, 663-689.

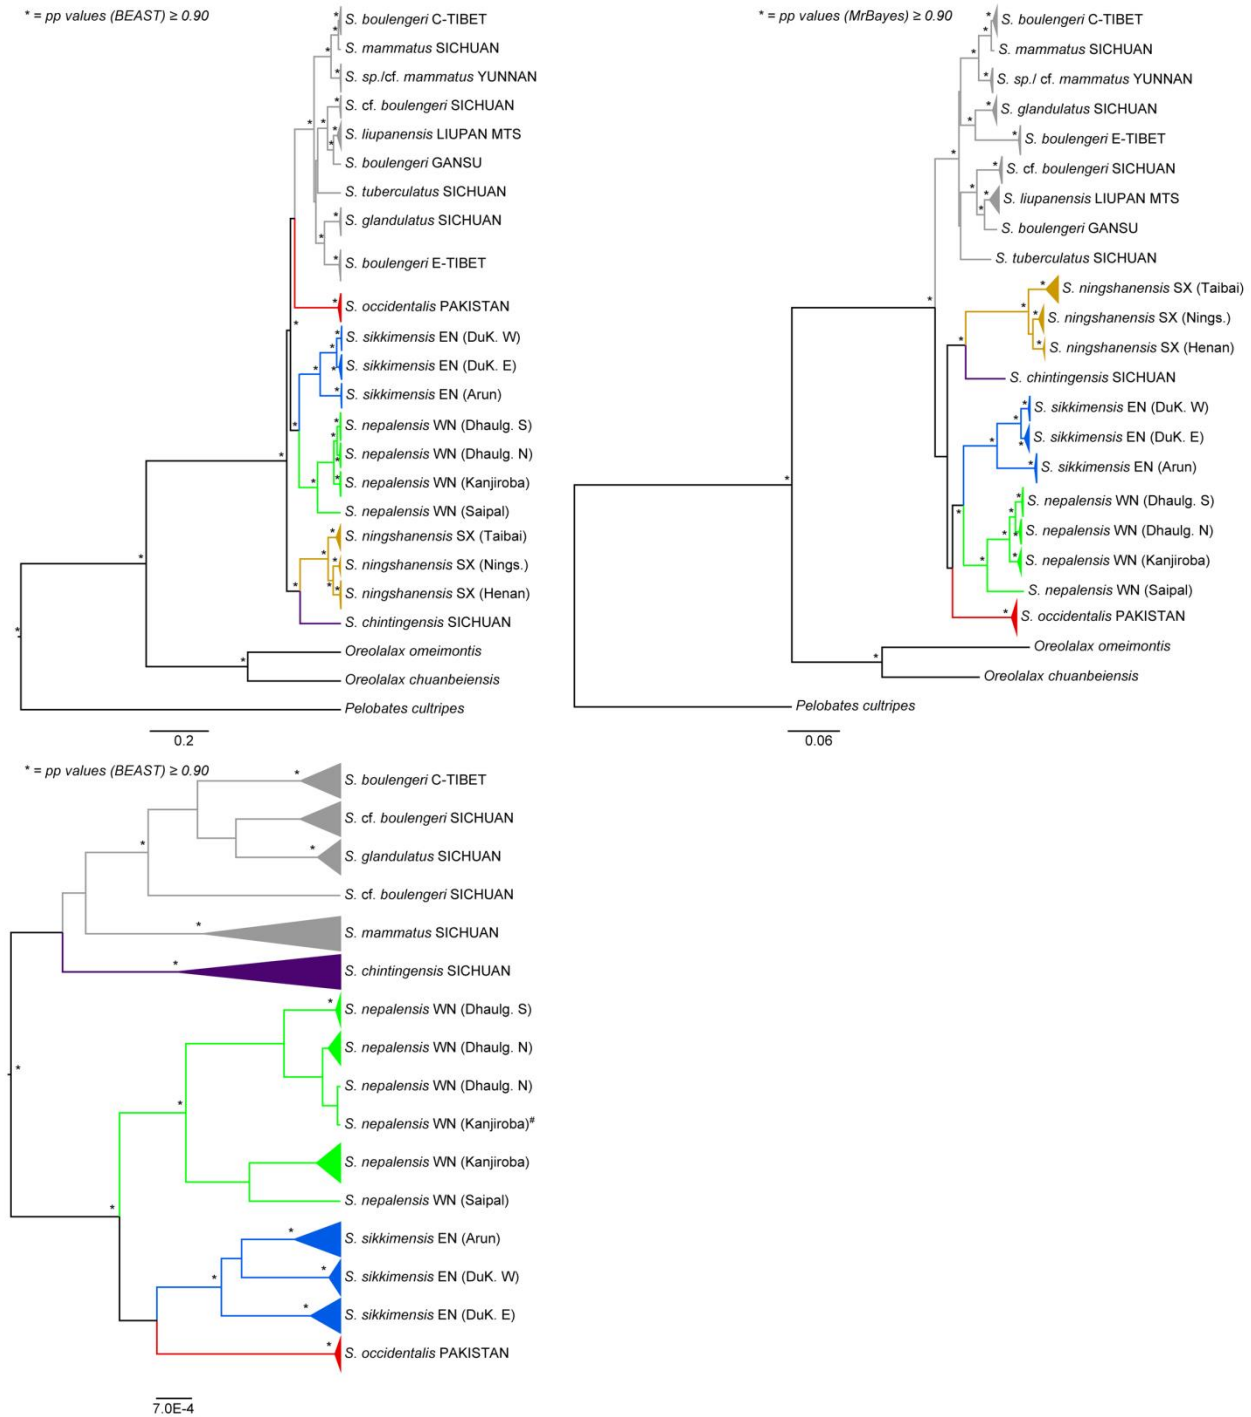

**Figure S1. Bayesian trees based on the combined mtDNA (upper panels) and nuDNA sequence data (lower panel) inferred with BEAST and MrBayes.** *Scutiger* (*S.*) is followed by the species name and by locality information (Table S5 for sample IDs). Nodes with multiple nodes from the same taxonomic unit and locality, and a posterior probability (pp) value  $\geq$  0.90 were collapsed. #voucher A2014-13 from Kanjiroba Himal was placed differently in the mtDNA and nDNA tree (for details see main text); C-Tibet=Central Tibet; Dhaulag. N/S=Dhaulagiri Himal North/South; DuK. E/W=Dudh Koshi River East/West; E-Tibet=East Tibet; EN=East Nepal; MTS=Mountains; Nings.=Ningshan; SX=Shaanxi; WN=West Nepal.

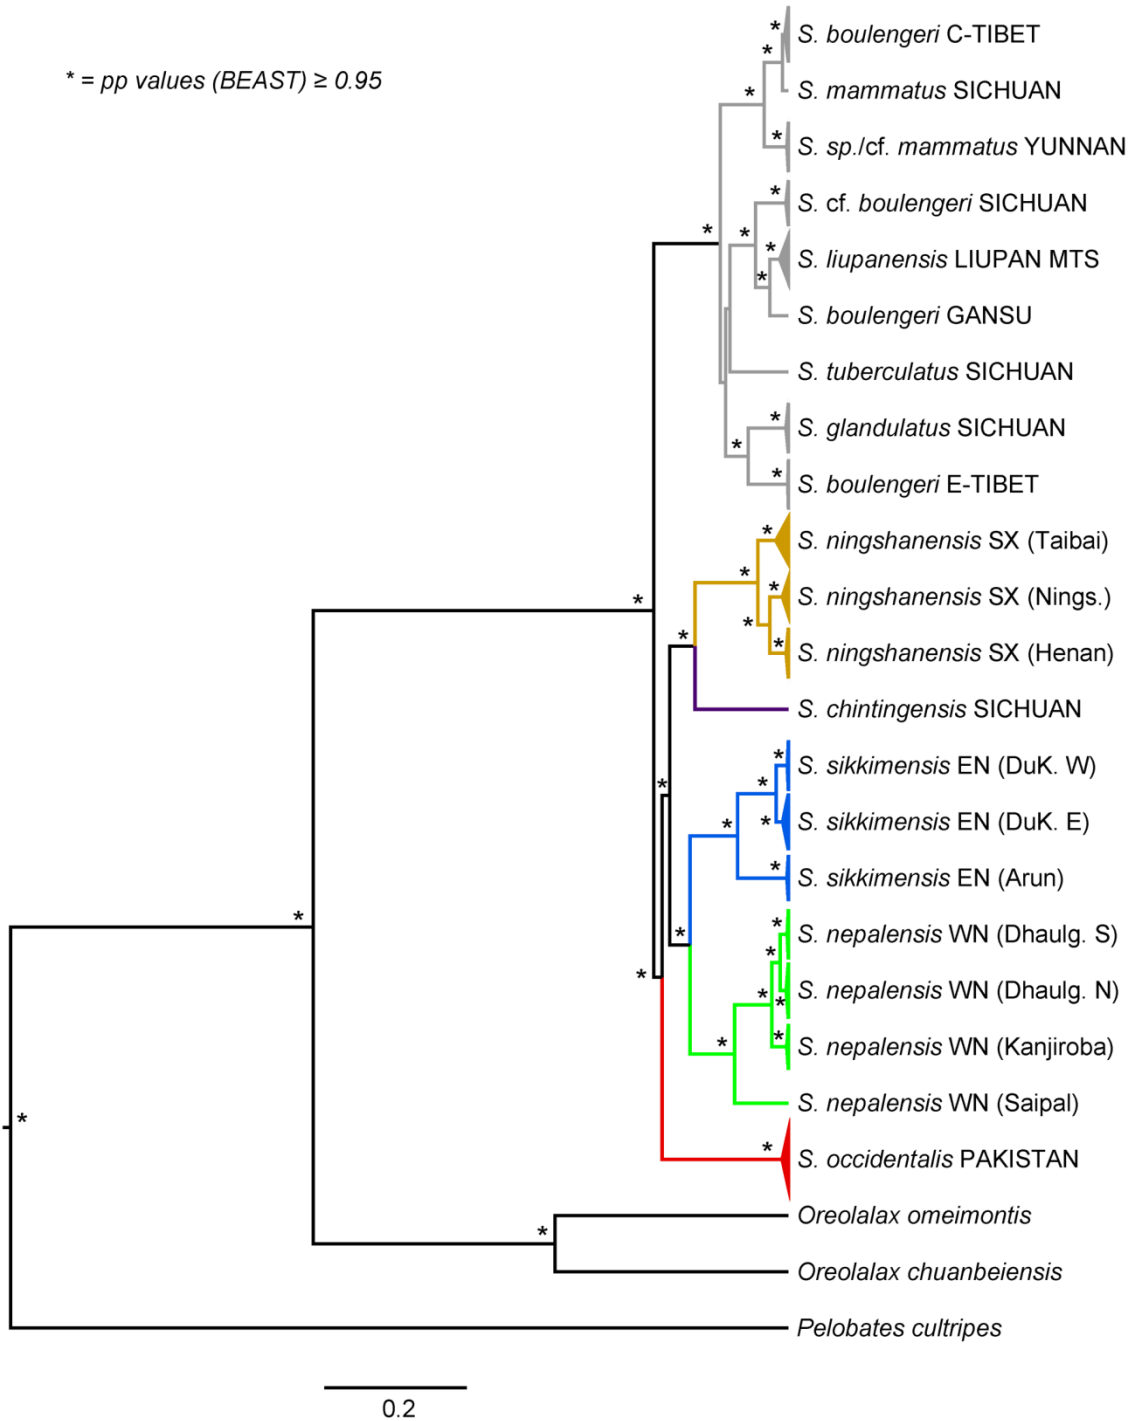

**Figure S2. Backbone constraint tree of the preferred model m3.3 inferred with BEAST.** *Scutigera* (*S.*) is followed by the species name and by locality information (Table S5 for sample IDs). Nodes with multiple nodes from the same taxonomic unit and locality, and a posterior probability (pp) value  $\geq 0.95$  were collapsed. C-Tibet=Central Tibet; Dhaulag. N/S=Dhaulagiri Himal North/South; DuK. E/W=Dudh Koshi River East/West; E-Tibet=East Tibet; EN=East Nepal; MTS=Mountains; Nings.=Ningshan; SX=Shaanxi; WN=West Nepal.

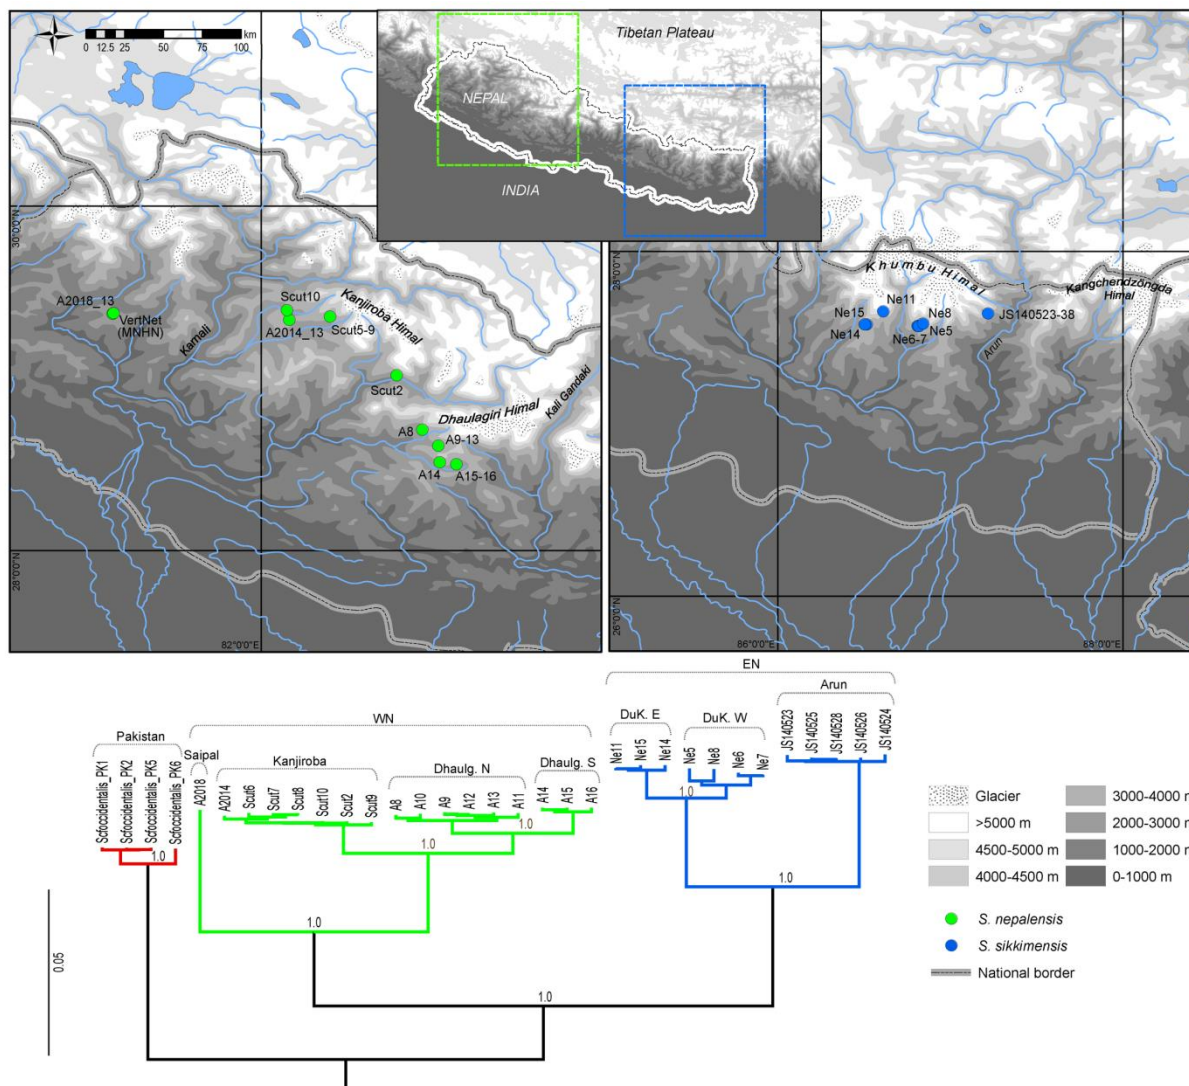

**Figure S3. Comparison of mtDNA phylogeny and sampling sites for *Scutigera nepalensis* (green; left panel) and *S. sikkimensis* (blue; right panel).** The tree was inferred by Bayesian Inference analysis using MrBayes v3.2.6 [1] based on concatenated mtDNA sequences; we run 10 million generations with four chains, starting with a random tree, sampling trees every 1000<sup>th</sup> generation until reaching an average standard deviation of split frequencies < 0.01. Partition scheme and substitution models were selected with PartitionFinder 1.1.1 [2]. Colour codes match those in Figs. 1-3. The record “VertNet (MNHN)” refers to vouchers of *S. nepalensis* from “Khaptar”, available via VertNet (<http://vertnet.org/>) and deposited at Museum National d’Histoire Naturelle Paris (MNHN), France. Dhaulg. N/S=Dhaulagiri Himal North/South; DuK. E/W=Dudh Koshi River East/West; EN=East Nepal; WN=West Nepal. Map created in ArcMap 10.3.1 (<https://www.esri.com/>).

## References

1. Ronquist, F. et al. MrBayes 3.2: efficient Bayesian phylogenetic inference and model choice across a large model space. *Systematic Biology* **61**, 539–542 (2012).
2. Lanfear, R., Calcott, B., Ho, S. Y. & Guindon, S. PartitionFinder: combined selection of partitioning schemes and substitution models for phylogenetic analyses. *Molecular Biology and Evolution* **29**, 1695–1701 (2012).

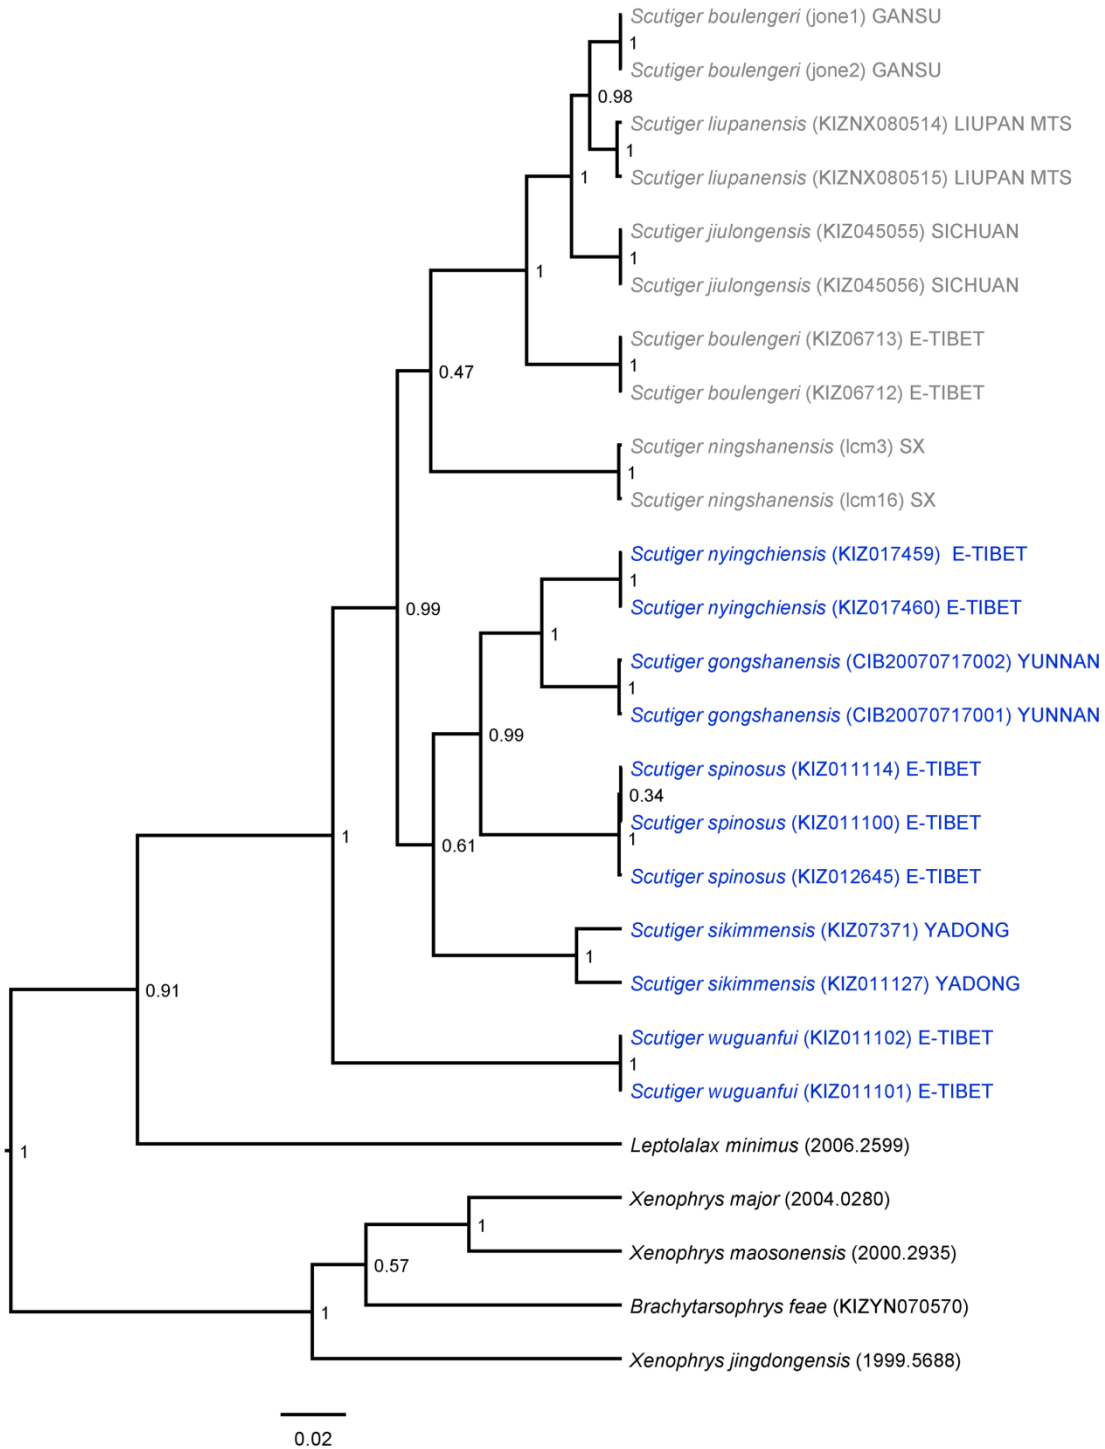

**Figure S4. Bayesian inference tree based on *col* sequences of the dataset as used in Jiang et al. 2016 [1].** Species name is followed by accession or sample number and by locality information. Species from the southern slope of the Himalaya are in blue, while those from the Tibet & Hengduan Shan area are in grey letters. E-Tibet=East Tibet; Liupan Mts=Liupan Mountains; SX=Shaanxi.

## Reference

Jiang, K. et al. A new species of the genus *Scutiger* (Anura: Megophryidae) from Medog of southeastern Tibet, China. *Zoological Research* **37**, 21–30 (2016).

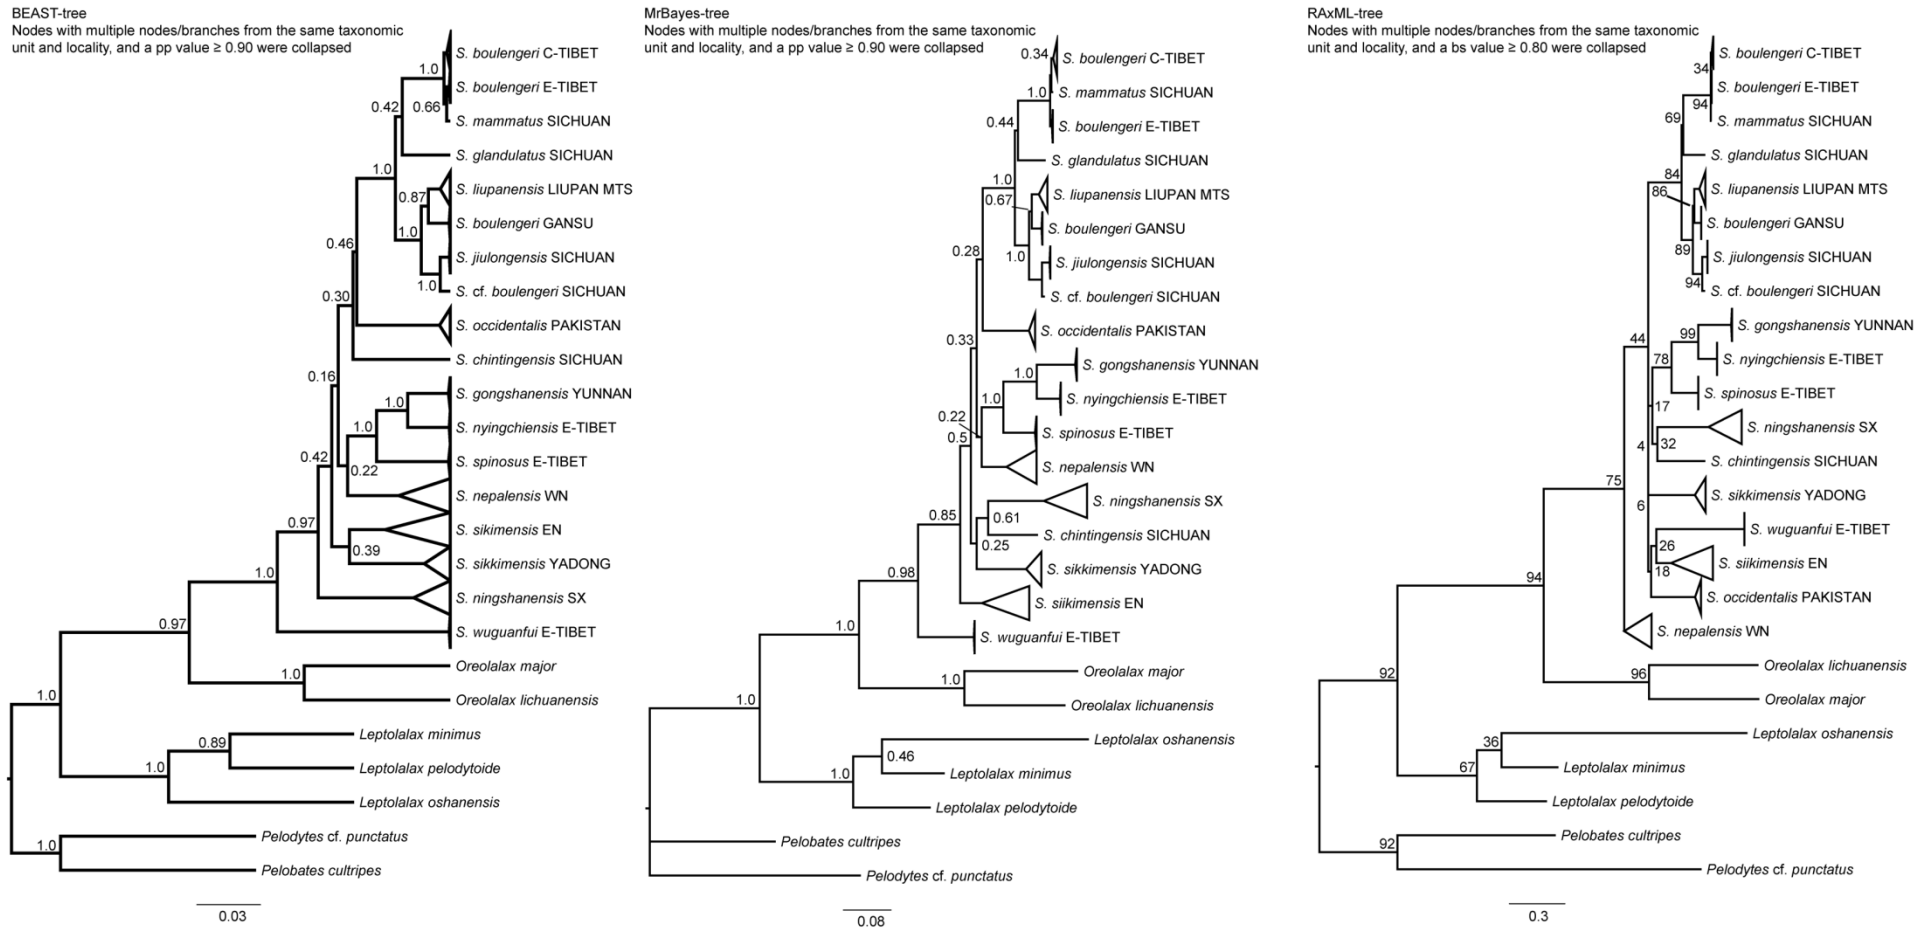

**Figure S5. Bayesian inference trees (left, middle) and Maximum likelihood tree (right) based on *coI* sequences of the dataset as used in Jiang et al. 2016 extended by sequences of this study and from NCBI. *Scutigera* species name is followed by locality information (Table S5 for sample IDs). C-Tibet=Central Tibet; EN=East Nepal; E-Tibet=East Tibet; Liupan Mts=Liupan Mountains; SX=Shaanxi; WN=West Nepal.**

**Table S1. Summarized results of the topological tests of different phylogenetic hypothesis (PH) for the mitochondrial data set.** Approximately unbiased (AU), Shimodaira–Hasegawa (SH) and weighted SH (WSH) test (p-values) were performed using CONSEL<sup>1</sup>, while marginal likelihoods for the Bayes Factor (BF) model selection approach were estimated based on the stepping stone (ss) and path sampling (ps) method in BEAST v.1.8.4<sup>2,3</sup>. A=Tibet-Hengduan Shan clade; B=*S. chintingsensis*/*S. ningshanensis* (Tsinling Mountains & Sichuan Basin clade); C=*S. nepalensis*/*S. sikkimensis* (Himalayan clade); D=*S. occidentalis*. Options that resampled topologies of other models were not tested (marked in italics). Best-supported model is in bold. A  $2\ln\text{BF} = 0-2$  means “not worth more than a bare mention”,  $2\ln\text{BF} = 2-6$  means “positive” support,  $2\ln\text{BF} = 6-10$  provides “strong” support, and  $2\ln\text{BF} > 10$  means “decisive” support.

| Model       | PH                | Remark                      | AU    | SH    | WSH   | ss              | ps              | 2lnBF                |                      |
|-------------|-------------------|-----------------------------|-------|-------|-------|-----------------|-----------------|----------------------|----------------------|
|             |                   |                             |       |       |       |                 |                 | ss                   | ps                   |
| m1          | (B(C(AD)))        | mt-BEAST tree               | 0.501 | 0.810 | 0.830 | -18901.4        | -18902.9        | m1:m2=3.4            | m1:m2=4.4            |
| m2          | (A(B(CD)))        | mt-MrBayes tree             | 0.212 | 0.507 | 0.651 | -18903.1        | -18900.7        | m1:m3.1=150.4        | m1:m3.1=152.4        |
| m3.1        | (D(ABC))          | mt-ML tree (v1)             | 0.635 | 0.869 | 0.868 | -18976.6        | -18979.1        | m1:m3.3=29.4         | m1:m3.3=34.6         |
| <i>m3.2</i> | <i>(B(ACD))</i>   | <i>mt-ML tree (v2) ≐ m1</i> |       |       |       |                 |                 | m1:m3.5=25.0         | m1:m3.5=26.0         |
| <b>m3.3</b> | <b>(A(D(BC)))</b> | mt-ML tree (v3)             | 0.392 | 0.813 | 0.795 | <b>-18886.7</b> | <b>-18885.5</b> | m1:m3.7=4.6          | m1:m3.7=5.2          |
| <i>m3.4</i> | <i>(A(B(CD)))</i> | <i>mt-ML tree (v4) ≐ m2</i> |       |       |       |                 |                 | m1:m3.8=5.2          | m1:m3.8=3.4          |
| m3.5        | ((AD)(BC))        | mt-ML tree (v5)             | 0.378 | 0.822 | 0.856 | -18890.6        | -18887.7        | m1:m4=74.4           | m1:m4=79.8           |
| <i>m3.6</i> | <i>((BA)(CD))</i> | <i>mt-ML tree (v6) ≐ m4</i> |       |       |       |                 |                 | m2:m3.1=147.0        | m2:m3.1=156.8        |
| m3.7        | (A((C(BD)))       | mt-ML tree (v7)             | 0.293 | 0.633 | 0.711 | -18903.7        | -18905.5        | m2:m3.3=32.8         | m2:m3.3=30.2         |
| m3.8        | (C(A(BD)))        | mt-ML tree (v8)             | 0.553 | 0.696 | 0.721 |                 |                 | m2:m3.5=172.0        | m2:m3.5=182.8        |
| m4          | ((BA)(CD))        | nu-trees                    | 0.172 | 0.470 | 0.576 | -18938.6        | -18942.8        | m2:m3.7=1.2          | m2:m3.7=9.6          |
|             |                   |                             |       |       |       |                 |                 | m2:m3.8=8.6          | m2:m3.8=1.0          |
|             |                   |                             |       |       |       |                 |                 | m2:m4=71.0           | m2:m4=84.2           |
|             |                   |                             |       |       |       |                 |                 | m3.1:m3.3=179.8      | m3.1:m3.3=187.0      |
|             |                   |                             |       |       |       |                 |                 | m3.1:m3.5=172.0      | m3.1:m3.5=182.8      |
|             |                   |                             |       |       |       |                 |                 | m3.1:m3.7=145.8      | m3.1:m3.7=147.2      |
|             |                   |                             |       |       |       |                 |                 | m3.1:m3.8=155.6      | m3.1:m3.8=155.8      |
|             |                   |                             |       |       |       |                 |                 | m3.1:m4=76.0         | m3.1:m4=72.6         |
|             |                   |                             |       |       |       |                 |                 | <b>m3.3:m3.5=7.8</b> | <b>m3.3:m3.5=4.2</b> |
|             |                   |                             |       |       |       |                 |                 | m3.3:m3.7=34.0       | m3.3:m3.7=39.8       |
|             |                   |                             |       |       |       |                 |                 | m3.3:m3.8=24.2       | m3.3:m3.8=31.2       |
|             |                   |                             |       |       |       |                 |                 | m3.3:m4=103.8        | m3.3:m4=114.4        |
|             |                   |                             |       |       |       |                 |                 | m3.5:m3.7=26.2       | m3.5:m3.7=35.6       |
|             |                   |                             |       |       |       |                 |                 | m3.5:m3.8=16.4       | m3.5:m3.8=27.0       |
|             |                   |                             |       |       |       |                 |                 | m3.5:m4=96.0         | m3.5:m4=110.2        |
|             |                   |                             |       |       |       |                 |                 | m3.7:m3.8=9.8        | m3.7:m3.8=8.6        |
|             |                   |                             |       |       |       |                 |                 | m3.7:m4=69.8         | m3.7:m4=74.6         |
|             |                   |                             |       |       |       |                 |                 | m3.8:m4=79.6         | m3.8:m4=83.2         |

1. Shimodaira, H. & Hasegawa, M. CONSEL: for assessing the confidence of phylogenetic tree selection. *Bioinformatics* 17, 1246–1247, (2001).
2. Drummond, A. J. & Rambaut, A. BEAST: Bayesian evolutionary analysis by sampling trees. *BMC Evolutionary Biology* 7, 214, (2007).
3. Drummond, A. J. et al. Bayesian phylogenetics with BEAUti and the BEAST 1.7. *Molecular Biology and Evolution* 29, 1969–1973, (2012).



**Table S2. Genetic between-group mean distances among *Scutiger* species based on concatenated four mitochondrial (a) and three nuclear (b) sequence data.** Lower matrix: p-distances, upper matrix: SD. *Scutiger sp.* and *S. cf. mammatus* refer to specimens from Yunnan [1].

| (a) <i>Scutiger</i>         | <i>boulengeri</i> | <i>glandulatus</i> | <i>nepalensis</i> | <i>occidentalis</i> | <i>sikkimensis</i> | <i>liupanensis</i> | <i>ningshanensis</i> | <i>sp.</i> | <i>cf. mammatus</i> | <i>mammatus</i> | <i>chintingensis</i> | <i>tuberculatus</i> |
|-----------------------------|-------------------|--------------------|-------------------|---------------------|--------------------|--------------------|----------------------|------------|---------------------|-----------------|----------------------|---------------------|
| <i>boulengeri</i> (n=20)    |                   | 0.37               | 0.46              | 0.46                | 0.51               | 0.47               | 0.76                 | 0.36       | 0.35                | 0.28            | 0.46                 | 0.45                |
| <i>glandulatus</i> (n=6)    | 6.60              |                    | 0.53              | 0.52                | 0.51               | 0.63               | 0.87                 | 0.46       | 0.46                | 0.42            | 0.49                 | 0.57                |
| <i>nepalensis</i> (n=17)    | 9.72              | 9.72               |                   | 0.50                | 0.46               | 0.75               | 0.78                 | 0.53       | 0.53                | 0.48            | 0.53                 | 0.66                |
| <i>occidentalis</i> (n=4)   | 10.10             | 9.84               | 9.91              |                     | 0.50               | 0.77               | 0.86                 | 0.58       | 0.58                | 0.47            | 0.53                 | 0.74                |
| <i>sikkimensis</i> (n=12)   | 11.17             | 11.01              | 9.19              | 10.07               |                    | 0.83               | 0.81                 | 0.59       | 0.59                | 0.52            | 0.53                 | 0.74                |
| <i>liupanensis</i> (n=8)    | 6.15              | 6.66               | 11.35             | 11.00               | 12.86              |                    | 0.90                 | 0.87       | 0.82                | 0.68            | 0.71                 | 0.81                |
| <i>ningshanensis</i> (n=15) | 13.38             | 13.57              | 13.59             | 13.16               | 13.78              | 13.44              |                      | 1.06       | 1.06                | 0.78            | 0.67                 | 0.99                |
| <i>sp.</i> (n=1)            | 5.40              | 6.15               | 8.96              | 9.74                | 10.52              | 8.06               | 13.01                |            | 0.10                | 0.34            | 0.62                 | 0.56                |
| <i>cf. mammatus</i> (n=1)   | 5.26              | 6.00               | 8.85              | 9.60                | 10.42              | 7.76               | 12.77                | 0.23       |                     | 0.33            | 0.61                 | 0.55                |
| <i>mammatus</i> (n=1)       | 4.71              | 6.32               | 9.67              | 9.74                | 10.92              | 7.77               | 12.85                | 3.04       | 2.90                |                 | 0.52                 | 0.56                |
| <i>chintingensis</i> (n=1)  | 9.75              | 9.60               | 9.39              | 9.42                | 10.14              | 11.05              | 10.93                | 9.01       | 8.92                | 9.31            |                      | 0.67                |
| <i>tuberculatus</i> (n=1)   | 6.03              | 5.37               | 8.92              | 9.37                | 10.31              | 7.50               | 13.03                | 5.34       | 5.14                | 5.61            | 8.71                 |                     |

| (b) <i>Scutiger</i>        | <i>nepalensis</i> | <i>sikkimensis</i> | <i>boulengeri</i> | <i>glandulatus</i> | <i>occidentalis</i> | <i>mammatus</i> | <i>chintingensis</i> |
|----------------------------|-------------------|--------------------|-------------------|--------------------|---------------------|-----------------|----------------------|
| <i>nepalensis</i> (n=14)   |                   | 0.11               | 0.22              | 0.25               | 0.13                | 0.17            | 0.17                 |
| <i>sikkimensis</i> (n=12)  | 0.7               |                    | 0.22              | 0.24               | 0.12                | 0.18            | 0.16                 |
| <i>boulengeri</i> (n=16)   | 1.2               | 1.3                |                   | 0.16               | 0.20                | 0.17            | 0.22                 |
| <i>glandulatus</i> (n=6)   | 1.5               | 1.5                | 0.7               |                    | 0.24                | 0.22            | 0.25                 |
| <i>occidentalis</i> (n=2)  | 0.7               | 0.6                | 1.0               | 1.3                |                     | 0.16            | 0.15                 |
| <i>mammatus</i> (n=2)      | 1.1               | 1.1                | 0.9               | 1.3                | 0.8                 |                 | 0.15                 |
| <i>chintingensis</i> (n=3) | 1.0               | 1.0                | 1.2               | 1.4                | 0.7                 | 0.9             |                      |

## Reference

Rao, D.-Q. & Wilkinson, J. A. Phylogenetic relationships of the mustache toads inferred from mtDNA sequences. *Molecular Phylogenetics and Evolution* **46**, 61–73 (2008).

**Table S3. Age estimates (in million years) for each node referenced in Figures 3.** Estimates (div. time) are given in millions of years, with the 95% highest posterior density interval (HDPI). This study=divergence time estimation based on node constraints obtained from fossil records and estimated ages in previous studies [1-4].

| Node no | This study |                 | Pyron 2014      | Zhang et al. 2013 |         |                   |         | Roelants et al. 2007 |             | San Mauro et al. 2005 |             |
|---------|------------|-----------------|-----------------|-------------------|---------|-------------------|---------|----------------------|-------------|-----------------------|-------------|
|         | div. time  | 95% HPDI        | div. time (r8s) | div. time (MDT)   | 95% CI  | div. time (BEAST) | 95% CI  | div. time            | 95% CI      | div. time             | 95% CI      |
| 1       | 209.5      | 193.6-227.9     | 209.5           | 209.0             | 186-238 | 236.8             | 199-278 | 233.9                | 210.2-258.2 | na                    | na          |
| 2       | 193.3      | 171.3-215.0     | 204.8           | 204.6             | 182-223 | 229.8             | 192-269 | 228.8                | 204-253     | na                    | na          |
| 3       | 180.1      | 154.5-209.3     | 160.1           | 191.0             | 168-219 | 207.6             | 154-266 | 202.9                | 179.6-228.3 | 198.6                 | 155.3-243.5 |
| 4       | 171.7      | 158.0-191.9     | 190.4           | 180.4             | 159-207 | 178.3             | 151-219 | 193.3                | 169.6-217.5 | na                    | na          |
| 5       | 157.6      | 135.7-181.3     | 155.7           | 158.1             | 137-183 | 145.7             | 105-194 | 167.3                | 145.5-190.9 | 163.6                 | 121.4-208.5 |
| 6       | 152.1      | na <sup>#</sup> | 110.1           | 168.1             | 146-194 | 185.1             | 117-247 | 151.2                | 128.8-179.2 | 151.5                 | 104.8-199.4 |
| 7       | 135.5      | 115.2-157.2     | 142.7           | 146.6             | 126-171 | 127.1             | 89-171  | 143.1                | 120.8-166.1 | 142.5                 | 100.5-186.6 |
| 8       | 109.3      | 83.9-132.3      | 125.5           | 124.1             | 104-148 | 102               | 61-136  | 114.6                | 93.2-135.9  | 117.9                 | 77.2-161.8  |
| 9*      | 89.4       | 66.7-110.1      | 96.8            | 102.6             | 84-125  | 79.3              | 47-110  | 63.8                 | 49.4-80.3   | na                    | na          |
| 10      | 64.2       | 47.5-81.4       | 57.5            | na                | na      | na                | na      | na                   | na          | na                    | na          |
| 11      | 53.4       | 39.4-70.5       | 48.7            | na                | na      | na                | na      | na                   | na          | na                    | na          |
| 12      | 29.2       | 20.4-38.6       | na              | na                | na      | na                | na      | na                   | na          | na                    | na          |
| 13      | 28.8       | 14.9-44.0       | na              | na                | na      | na                | na      | na                   | na          | na                    | na          |
| 14      | 25.5       | 18.2-34.6       | na              | na                | na      | na                | na      | na                   | na          | na                    | na          |
| 15      | 22.8       | 15.4-31.1       | na              | na                | na      | na                | na      | na                   | na          | na                    | na          |
| 16      | 20.4       | 13.6-28.6       | na              | na                | na      | na                | na      | na                   | na          | na                    | na          |
| 17      | 18.0       | 11.2-26.9       | na              | na                | na      | na                | na      | na                   | na          | na                    | na          |
| 18      | 12.1       | 8.7-16.1        | 6.3             | na                | na      | na                | na      | na                   | na          | na                    | na          |
| 19      | 11.7       | 6.3-18.3        | na              | na                | na      | na                | na      | na                   | na          | na                    | na          |
| 20      | 10.9       | 5.6-17.5        | na              | na                | na      | na                | na      | na                   | na          | na                    | na          |
| 21      | 10.1       | 6.7-13.7        | na              | na                | na      | na                | na      | na                   | na          | na                    | na          |
| 22      | 7.0        | 3.9-11.0        | na              | na                | na      | na                | na      | na                   | na          | na                    | na          |
| 23      | 6.0        | 3.1-9.5         | na              | na                | na      | na                | na      | na                   | na          | na                    | na          |
| 24      | 5.5        | 2.8-9.0         | na              | na                | na      | na                | na      | na                   | na          | na                    | na          |
| 25      | 4.1        | 1.5-7.4         | na              | na                | na      | na                | na      | na                   | na          | na                    | na          |
| 26      | 4.0        | 1.8-6.9         | na              | na                | na      | na                | na      | na                   | na          | na                    | na          |
| ...     | <4         |                 | na              | na                | na      | na                | na      | na                   | na          | na                    | na          |

\*Megophryidae [5]; <sup>#</sup>no HPD intervals are presented, because the node occur in less than 50% of the trees.

1. Pyron, R. A. Biogeographic analysis reveals ancient continental vicariance and recent oceanic dispersal in amphibians. *Systematic Biology* **63**, 779–797 (2014).
2. Zhang, P. et al. Efficient sequencing of Anuran mtDNAs and a mitogenomic exploration of the phylogeny and evolution of frogs. *Molecular Biology and Evolution* **30**, 1899–18915 (2013).
3. Roelants, K. et al. Global patterns of diversification in the history of modern amphibians. *Proceedings of the National Academy of Sciences* **104**, 887–92 (2007).
4. San Mauro, D. et al. Initial diversification of living amphibians predated the breakup of Pangaea. *American Naturalist*. **165**, 590–9 (2005).
5. Frost, D. R. et al. The amphibian tree of life. *Bulletin of the American Museum of Natural History* **297**, 1–370 (2006).

**Table S4. Estimates of evolutionary divergence (uncorrected p-distances) based on partial *coI* (556 bp) between haplotypes of major lineages from *Scutiger* species ([1-4], our samples). Species name is followed by sample name (own data) or GenBank accession number and location. Conspecific distances ( $\leq 2.5$  %) are light grey-shaded, while intraspecific distances  $>2.5$  % are dark grey-shaded. Divergences between *S. occidentalis* and *S. nyingchiensis* are in bold. C = Central; E = East; W = West, NH = Ningxia Hui.**

|                                                 | [1]  | [2]  | [3]  | [4]  | [5]  | [6]  | [7]  | [8]  | [9]  | [10] | [11] | [12] | [13] | [14] | [15] | [16] | [17] | [18] | [19]        | [20]        | [21] | [22] | [23] | [24] | [25] | [26] | [27] | [28] | [29] | [30] |
|-------------------------------------------------|------|------|------|------|------|------|------|------|------|------|------|------|------|------|------|------|------|------|-------------|-------------|------|------|------|------|------|------|------|------|------|------|
| [1] <i>S. boulengeri</i> (A1AL_2010) C-TIBET    |      | 0.3  | 0.0  | 0.3  | 1.1  | 1.1  | 1.5  | 1.1  | 1.4  | 1.4  | 1.1  | 1.1  | 1.1  | 1.1  | 0.3  | 1.5  | 1.5  | 1.3  | 1.3         | 1.3         | 1.3  | 1.4  | 1.5  | 1.4  | 1.4  | 1.5  | 1.5  | 1.5  | 1.5  | 1.5  |
| [2] <i>S. boulengeri</i> (A5AL_2010) C-TIBET    | 0.5  |      | 0.3  | 0.3  | 1.0  | 1.0  | 1.4  | 1.1  | 1.4  | 1.4  | 1.1  | 1.0  | 1.0  | 1.1  | 0.3  | 1.5  | 1.4  | 1.3  | 1.3         | 1.3         | 1.3  | 1.4  | 1.4  | 1.4  | 1.4  | 1.5  | 1.4  | 1.5  | 1.5  | 1.5  |
| [3] <i>S. boulengeri</i> (JN700837) TIBET       | 0.0  | 0.5  |      | 0.3  | 1.1  | 1.1  | 1.5  | 1.1  | 1.4  | 1.4  | 1.1  | 1.1  | 1.1  | 1.1  | 0.3  | 1.5  | 1.5  | 1.3  | 1.3         | 1.3         | 1.3  | 1.4  | 1.5  | 1.4  | 1.4  | 1.5  | 1.5  | 1.5  | 1.5  | 1.5  |
| [4] <i>S. boulengeri</i> (KU243064) E-TIBET     | 0.7  | 0.5  | 0.7  |      | 1.1  | 1.1  | 1.4  | 1.1  | 1.4  | 1.4  | 1.1  | 1.0  | 1.1  | 1.1  | 0.2  | 1.5  | 1.4  | 1.3  | 1.3         | 1.3         | 1.3  | 1.4  | 1.5  | 1.4  | 1.4  | 1.5  | 1.4  | 1.5  | 1.5  | 1.4  |
| [5] <i>S. cf. boulengeri</i> (KQ8-2014) SICHUAN | 7.4  | 7.2  | 7.4  | 7.2  |      | 0.8  | 1.4  | 1.0  | 1.4  | 1.4  | 0.5  | 0.7  | 0.8  | 0.8  | 1.0  | 1.4  | 1.4  | 1.3  | 1.3         | 1.3         | 1.3  | 1.4  | 1.5  | 1.4  | 1.4  | 1.5  | 1.4  | 1.5  | 1.5  | 1.4  |
| [6] <i>S. boulengeri</i> (KJ082073) GANSU       | 7.7  | 7.6  | 7.7  | 7.6  | 3.8  |      | 1.4  | 1.1  | 1.5  | 1.5  | 0.8  | 0.7  | 0.7  | 0.7  | 1.1  | 1.3  | 1.3  | 1.3  | 1.3         | 1.3         | 1.4  | 1.4  | 1.4  | 1.4  | 1.4  | 1.4  | 1.5  | 1.4  | 1.4  | 1.3  |
| [7] <i>S. chingensis</i> (LC141) SICHUAN        | 13.1 | 12.6 | 13.1 | 12.9 | 11.9 | 12.2 |      | 1.4  | 1.5  | 1.5  | 1.4  | 1.4  | 1.4  | 1.4  | 1.4  | 1.3  | 1.3  | 1.4  | 1.3         | 1.3         | 1.4  | 1.4  | 1.4  | 1.3  | 1.4  | 1.4  | 1.4  | 1.4  | 1.4  | 1.4  |
| [8] <i>S. glandulatus</i> (Sc1-2014) SICHUAN    | 7.6  | 7.6  | 7.6  | 7.6  | 7.2  | 7.0  | 12.1 |      | 1.5  | 1.5  | 1.0  | 1.0  | 1.0  | 1.1  | 1.0  | 1.4  | 1.4  | 1.3  | 1.3         | 1.3         | 1.4  | 1.5  | 1.5  | 1.5  | 1.5  | 1.4  | 1.4  | 1.5  | 1.4  | 1.4  |
| [9] <i>S. gongshanensis</i> (KU243062) YUNNAN   | 14.2 | 13.7 | 14.2 | 14.0 | 13.3 | 13.7 | 14.0 | 14.4 |      | 0.2  | 1.4  | 1.4  | 1.4  | 1.4  | 1.4  | 1.4  | 1.4  | 1.4  | 1.4         | 1.4         | 1.1  | 1.5  | 1.5  | 1.4  | 1.4  | 1.4  | 1.5  | 1.3  | 1.4  | 1.3  |
| [10] <i>S. gongshanensis</i> (KU243063) YUNNAN  | 14.4 | 13.8 | 14.4 | 14.2 | 13.5 | 13.8 | 14.2 | 14.6 | 0.2  |      | 1.4  | 1.4  | 1.4  | 1.4  | 1.4  | 1.4  | 1.4  | 1.4  | 1.4         | 1.4         | 1.1  | 1.5  | 1.5  | 1.4  | 1.4  | 1.4  | 1.5  | 1.3  | 1.4  | 1.3  |
| [11] <i>S. julongensis</i> (KU243066) SICHUAN   | 7.6  | 7.6  | 7.6  | 7.6  | 1.6  | 4.1  | 11.9 | 6.8  | 14.0 | 14.2 |      | 0.8  | 0.8  | 0.9  | 1.1  | 1.4  | 1.4  | 1.3  | 1.3         | 1.3         | 1.4  | 1.4  | 1.4  | 1.4  | 1.4  | 1.4  | 1.4  | 1.4  | 1.4  | 1.4  |
| [12] <i>S. liupanensis</i> (KC140483) NH        | 7.9  | 7.7  | 7.9  | 7.7  | 3.4  | 2.5  | 11.5 | 6.3  | 13.5 | 13.7 | 4.1  |      | 0.2  | 0.5  | 1.0  | 1.3  | 1.3  | 1.2  | 1.4         | 1.3         | 1.3  | 1.4  | 1.4  | 1.4  | 1.4  | 1.4  | 1.4  | 1.4  | 1.4  | 1.4  |
| [13] <i>S. liupanensis</i> (KC140479) NH        | 8.1  | 7.9  | 8.1  | 7.9  | 3.6  | 2.7  | 11.3 | 6.5  | 13.3 | 13.5 | 4.0  | 0.2  |      | 0.5  | 1.0  | 1.3  | 1.3  | 1.2  | 1.4         | 1.3         | 1.3  | 1.4  | 1.4  | 1.4  | 1.4  | 1.4  | 1.4  | 1.4  | 1.4  | 1.4  |
| [14] <i>S. liupanensis</i> (KC140474) NH        | 8.3  | 8.1  | 8.3  | 8.1  | 4.5  | 3.2  | 11.3 | 7.2  | 13.1 | 13.3 | 5.2  | 1.4  | 1.6  |      | 1.1  | 1.4  | 1.3  | 1.3  | 1.3         | 1.3         | 1.4  | 1.4  | 1.4  | 1.4  | 1.4  | 1.5  | 1.4  | 1.4  | 1.4  | 1.3  |
| [15] <i>S. mammatus</i> (LC045) SICHUAN         | 0.7  | 0.5  | 0.7  | 0.4  | 7.2  | 7.6  | 12.8 | 7.6  | 13.8 | 14.0 | 7.6  | 7.7  | 7.9  | 8.1  |      | 1.5  | 1.4  | 1.3  | 1.3         | 1.3         | 1.3  | 1.4  | 1.4  | 1.4  | 1.4  | 1.5  | 1.4  | 1.5  | 1.5  | 1.5  |
| [16] <i>S. nepalensis</i> (A8-2012) W-NEPAL     | 13.5 | 13.3 | 13.5 | 13.1 | 12.9 | 12.1 | 11.9 | 12.4 | 13.3 | 13.5 | 12.6 | 11.9 | 12.1 | 12.2 | 12.9 |      | 0.6  | 1.1  | 1.3         | 1.3         | 1.3  | 1.5  | 1.5  | 1.4  | 1.3  | 1.3  | 1.3  | 1.4  | 1.4  | 1.3  |
| [17] <i>S. nepalensis</i> (MS_Scu2) W-NEPAL     | 13.3 | 13.1 | 13.3 | 12.9 | 12.2 | 11.3 | 10.6 | 12.2 | 12.8 | 12.9 | 12.6 | 11.0 | 11.2 | 11.2 | 12.8 | 2.0  |      | 1.1  | 1.3         | 1.3         | 1.3  | 1.4  | 1.4  | 1.3  | 1.3  | 1.3  | 1.4  | 1.4  | 1.4  | 1.2  |
| [18] <i>S. nepalensis</i> (A201813) W-NEPAL     | 11.9 | 11.7 | 11.9 | 11.5 | 11.5 | 11.0 | 11.5 | 12.1 | 12.9 | 13.1 | 11.2 | 10.8 | 11.0 | 11.2 | 11.3 | 7.6  | 7.2  |      | 1.3         | 1.3         | 1.4  | 1.5  | 1.5  | 1.5  | 1.4  | 1.4  | 1.4  | 1.5  | 1.5  | 1.2  |
| [19] <i>S. occidentalis</i> (MS_Pk2) PAKISTAN   | 11.0 | 10.6 | 11.0 | 10.8 | 10.3 | 10.4 | 11.2 | 10.8 | 13.7 | 13.8 | 9.9  | 10.8 | 11.0 | 11.0 | 10.6 | 12.2 | 11.7 | 11.3 |             | 0.5         | 1.4  | 1.4  | 1.4  | 1.4  | 1.3  | 1.3  | 1.4  | 1.4  | 1.4  | 1.4  |
| [20] <i>S. occidentalis</i> (MS_Pk6) PAKISTAN   | 11.2 | 11.2 | 11.2 | 11.0 | 10.8 | 11.0 | 11.0 | 11.0 | 12.8 | 12.9 | 10.4 | 11.3 | 11.5 | 11.5 | 10.8 | 11.3 | 10.8 | 11.2 | 1.6         |             | 1.3  | 1.4  | 1.4  | 1.3  | 1.3  | 1.3  | 1.4  | 1.4  | 1.4  | 1.3  |
| [21] <i>S. nyingchiensis</i> (KU243056) TIBET   | 12.6 | 12.4 | 12.6 | 12.6 | 12.2 | 12.8 | 12.8 | 13.1 | 7.9  | 8.1  | 12.6 | 12.1 | 11.9 | 12.1 | 12.4 | 12.2 | 11.7 | 12.2 | <b>12.6</b> | <b>12.1</b> |      | 1.3  | 1.4  | 1.3  | 1.3  | 1.3  | 1.3  | 1.5  | 1.4  | 1.4  |
| [22] <i>S. ningshanensis</i> (KF757408) SHAANXI | 14.9 | 14.4 | 14.9 | 14.6 | 13.3 | 13.8 | 13.3 | 15.3 | 14.9 | 15.1 | 13.1 | 13.7 | 13.5 | 13.7 | 14.4 | 14.9 | 14.4 | 15.5 | 13.3        | 13.3        | 13.5 |      | 0.7  | 0.9  | 0.8  | 1.5  | 1.5  | 1.4  | 1.5  | 1.4  |
| [23] <i>S. ningshanensis</i> (KF757419) SHAANXI | 15.6 | 15.1 | 15.6 | 15.3 | 14.0 | 13.7 | 13.3 | 15.6 | 14.7 | 14.9 | 13.8 | 13.3 | 13.1 | 12.9 | 15.1 | 15.1 | 14.7 | 16.2 | 14.0        | 14.0        | 14.0 | 3.1  |      | 1.0  | 1.0  | 1.4  | 1.5  | 1.4  | 1.5  | 1.4  |
| [24] <i>S. ningshanensis</i> (KF757427) SHAANXI | 13.1 | 12.6 | 13.1 | 12.9 | 12.8 | 12.9 | 11.5 | 13.5 | 13.3 | 13.5 | 12.8 | 13.3 | 13.5 | 13.1 | 12.8 | 13.1 | 12.9 | 14.4 | 12.4        | 11.9        | 12.8 | 4.9  | 6.3  |      | 0.6  | 1.4  | 1.4  | 1.4  | 1.4  | 1.3  |
| [25] <i>S. ningshanensis</i> (KF757437) SHAANXI | 12.6 | 12.1 | 12.6 | 12.4 | 12.4 | 12.4 | 11.7 | 12.9 | 13.7 | 13.8 | 12.4 | 12.4 | 12.6 | 11.9 | 12.2 | 12.1 | 11.9 | 13.8 | 12.2        | 12.1        | 12.8 | 4.5  | 5.9  | 2.3  |      | 1.4  | 1.4  | 1.4  | 1.4  | 1.3  |
| [26] <i>S. skimmensis</i> (Ne8-2013) E-NEPAL    | 14.0 | 13.7 | 14.0 | 14.0 | 13.1 | 12.2 | 12.1 | 12.2 | 12.8 | 12.9 | 12.9 | 12.2 | 12.4 | 12.4 | 13.7 | 11.0 | 10.6 | 12.6 | 11.5        | 11.7        | 12.8 | 15.1 | 14.9 | 12.9 | 13.7 |      | 1.2  | 1.4  | 1.4  | 1.3  |
| [27] <i>S. skimmensis</i> (JS140527) E-NEPAL    | 14.0 | 13.7 | 14.0 | 14.0 | 13.1 | 13.3 | 13.7 | 12.6 | 15.8 | 16.0 | 13.3 | 12.2 | 12.4 | 12.4 | 13.7 | 13.7 | 13.5 | 13.3 | 12.9        | 13.5        | 14.4 | 15.1 | 14.4 | 13.7 | 14.0 | 9.0  |      | 1.4  | 1.4  | 1.5  |
| [28] <i>S. skimmensis</i> (KU243058) YADONG     | 14.6 | 14.0 | 14.6 | 14.2 | 14.6 | 13.7 | 11.9 | 13.8 | 12.1 | 12.1 | 14.2 | 13.8 | 13.7 | 13.8 | 14.2 | 13.5 | 13.5 | 14.6 | 12.6        | 12.4        | 12.1 | 13.8 | 13.3 | 11.3 | 12.1 | 13.1 | 12.4 |      | 0.8  | 1.4  |
| [29] <i>S. skimmensis</i> (KU243059) YADONG     | 14.6 | 14.0 | 14.6 | 14.4 | 13.7 | 12.8 | 12.6 | 13.5 | 12.9 | 12.9 | 14.0 | 12.8 | 12.9 | 12.8 | 14.0 | 13.7 | 12.9 | 14.6 | 12.4        | 12.6        | 13.3 | 14.4 | 13.7 | 11.9 | 12.6 | 12.4 | 12.8 | 4.3  |      | 1.4  |
| [30] <i>S. spinosus</i> (KU243053) E-TIBET      | 12.8 | 12.6 | 12.8 | 12.6 | 12.2 | 11.2 | 12.1 | 11.7 | 10.1 | 10.3 | 12.6 | 11.5 | 11.7 | 11.3 | 12.6 | 10.4 | 9.4  | 10.4 | 11.7        | 11.0        | 9.9  | 14.2 | 13.3 | 11.9 | 11.9 | 11.7 | 14.0 | 11.9 | 12.4 |      |
| [31] <i>S. wuguanli</i> (KU243060) E-TIBET      | 14.9 | 14.6 | 14.9 | 14.7 | 16.2 | 15.1 | 14.7 | 16.2 | 16.7 | 16.9 | 16.2 | 15.8 | 16.0 | 16.0 | 14.4 | 15.8 | 15.5 | 14.6 | 15.8        | 15.6        | 14.6 | 13.8 | 14.4 | 13.1 | 13.5 | 14.2 | 15.5 | 13.5 | 15.3 | 14.7 |

1. Che, J. et al. Universal COI primers for DNA barcoding amphibians. *Molecular Ecology Resources* **12**, 247–58 (2012).
2. Jiang, K. et al. A new species of the genus *Scutiger* (Anura: Megophryidae) from Medog of southeastern Tibet, China. *Zoological Research* **37**:21–30 (2016).
3. Meng, H., Li, X., & Qiao, P. Population structure, historical biogeography and demographic history of the alpine toad *Scutiger ningshanensis* in the Tsinling Mountains of Central China. *PLoS One* **9**, e100729 (2014).
4. Su, L.-N., Meng, H.-Z., Li, X.-C. Genetic diversity and historical demography of the narrow-range endemic Alpine toad, *Scutiger liupanensis*, in the Liupan Mountains of central China. *Genetics and Molecular Research* **14**, 4865–78 (2015).

**Table S5. Taxa, sample ID or voucher numbers, sample localities and GenBank accession numbers.** The lower part of the table corresponds to the sequences used for the taxonomical evaluation of *Scutigera occidentalis* based on mitochondrial *coI* sequence data (for details see text). The “Clade; lineage/locality” label corresponds to Fig. 2 and 3, and S1-S5: GH=Greater Himalaya, THS=Tibet & Hengduan Shan clade, TMS=Tsinling Mountains & Sichuan Basin; C-Tibet=Central Tibet; E-Tibet=East Tibet; EN=East Nepal; SX=Shaanxi; WN=West Nepal; Dhaulg. N/S =Dhaulagiri Himal North/South, DuK. E/W=Dudh Koshi River East/West.; Nings.=Ningshan; NHAR=Ningxia Hui Autonomous Region, TAR=Tibet Autonomous Region; CIB= Chengdu Institute of Biology, NME=Natural History Museum of Erfurt, CAS=Chinese Academy of Science. Coordinates are given in degree, minutes.

| Taxon                    | Clade; lineage/locality | Sample ID       | origin     | Sample site               | Lat    | Long    | Alt  | mtDNA ( <i>16s/coI/cytb/nd4</i> )   | nDNA ( <i>bfib7/ccnb2/intron3/rag1</i> ) |
|--------------------------|-------------------------|-----------------|------------|---------------------------|--------|---------|------|-------------------------------------|------------------------------------------|
| <i>S. cf. boulengeri</i> | THS; SICHUAN            | KQ2_2014        | this study | China, Sichuan, Garzê     | 30°22' | 101°40' | 4062 | KY310750/KY310860/KY310912/KY310972 | KY310809/-/KY311026                      |
| <i>S. cf. boulengeri</i> | THS; SICHUAN            | KQ3_2014        | this study | China, Sichuan, Garzê     | 30°22' | 101°40' | 4062 | KY310751/KY310861/KY310913/KY310973 | KY310810/KY352189/KY311027               |
| <i>S. cf. boulengeri</i> | THS; SICHUAN            | KQ4_2014        | this study | China, Sichuan, Garzê     | 30°22' | 101°40' | 4062 | KY310752/KY310862/KY310914/KY310974 | KY310811/KY352190/KY311028               |
| <i>S. cf. boulengeri</i> | THS; SICHUAN            | KQ5_2014        | this study | China, Sichuan, Garzê     | 30°22' | 101°40' | 4062 | KY310753/KY310863/KY310915/KY310975 | KY310812/-/KY311029                      |
| <i>S. cf. boulengeri</i> | THS; SICHUAN            | KQ6_2014        | this study | China, Sichuan, Garzê     | 30°22' | 101°40' | 4062 | KY310754/KY310864/KY310916/KY310976 | KY310813/KY352191/KY311030               |
| <i>S. cf. boulengeri</i> | THS; SICHUAN            | KQ7_2014        | this study | China, Sichuan, Garzê     | 30°22' | 101°40' | 4062 | KY310755/KY310865/KY310917/KY310977 | KY310814/KY352192/KY311031               |
| <i>S. cf. boulengeri</i> | THS; SICHUAN            | KQ8_2014        | this study | China, Sichuan, Garzê     | 30°22' | 101°40' | 4062 | KY310756/KY310866/KY310918/KY310978 | -/KY352193/KY311032                      |
| <i>S. cf. boulengeri</i> | THS; SICHUAN            | KQ12_2014       | this study | China, Sichuan, Garzê     | 30°22' | 101°40' | 4062 | KY310757/KY310867/KY310919/KY310979 | KY310815/-/KY311033                      |
| <i>S. cf. boulengeri</i> | THS; SICHUAN            | KQ14_2014       | this study | China, Sichuan, Garzê     | 30°22' | 101°40' | 4062 | KY310758/KY310868/KY310920/KY310980 | KY310816/KY352194/KY311034               |
| <i>S. cf. boulengeri</i> | THS; SICHUAN            | KQ16_2014       | this study | China, Sichuan, Garzê     | 30°22' | 101°40' | 4062 | KY310759/KY310869/KY310921/KY310981 | KY310817/-/KY311035                      |
| <i>S. boulengeri</i>     | THS; C-TIBET            | A1-AL           | this study | China, TAR, Tabeiya       | 29°36' | 85°44'  | 5067 | KY310760/KY310870/KY310922/KY310982 | KY310818/KY352195/KY311036               |
| <i>S. boulengeri</i>     | THS; C-TIBET            | A2-AL           | this study | China, TAR, Tabeiya       | 29°36' | 85°44'  | 5067 | KY310761/KY310871/KY310923/KY310983 | KY310819/-/KY311037                      |
| <i>S. boulengeri</i>     | THS; C-TIBET            | A3-AL           | this study | China, TAR, Damxung       | 30°09' | 90°38'  | 4887 | KY310762/KY310872/KY310924/KY310984 | KY310820/-/KY311038                      |
| <i>S. boulengeri</i>     | THS; C-TIBET            | A4-AL           | this study | China, TAR, Damxung       | 30°09' | 90°38'  | 4887 | KY310763/KY310873/KY310925/KY310985 | same as A3-AL                            |
| <i>S. boulengeri</i>     | THS; C-TIBET            | A5-AL           | this study | China, TAR, Damxung       | 30°09' | 90°38'  | 4887 | KY310764/KY310874/KY310926/KY310986 | KY310821/KY352196/KY311039               |
| <i>S. boulengeri</i>     | THS; C-TIBET            | JS1507_C1       | this study | China, TAR, Lhasa         | 30°19' | 91°31'  | 4400 | KY310765/KY310875/KY310927/KY310987 | KY310822/-/KY311040                      |
| <i>S. boulengeri</i>     | THS; C-TIBET            | JS1507_C2       | this study | China, TAR, Lhasa         | 30°19' | 91°31'  | 4400 | KY310766/KY310876/KY310928/KY310988 | KY310823/-/KY311041                      |
| <i>S. boulengeri</i>     | THS; E-TIBET            | CAS_XM1091      | this study | China, TAR, Nyngchi       | 29°40' | 94°42'  | 3850 | KY310767/-/KY310929/KY310989        | +/+                                      |
| <i>S. boulengeri</i>     | THS; E-TIBET            | CAS_XM1095      | this study | China, TAR, Nyngchi       | 29°40' | 94°42'  | 3850 | KY310768/KY310877/-/KY310990        | +/+                                      |
| <i>S. boulengeri</i>     | THS; GANSU              | jone1           | NCBI       | China, Gansu, Jone County | 34°32' | 103°29' |      | -/KJ082073/KJ082065/-               | +/+                                      |
| <i>S. chintingensis</i>  | TMS; SICHUAN            | JF174; ROM40460 | NCBI       | China, Sichuan            | 29°39' | 102°57' |      | +/+/                                | FJ945585/FJ945677/EF397301               |
| <i>S. chintingensis</i>  | TMS; SICHUAN            | LC141           | this study | China, Sichuan, Tianquan  | 30°14' | 102°30' | 2500 | KY310769/KY310878/KY310930/KY310991 |                                          |
| <i>S. chintingensis</i>  | TMS; SICHUAN            | LC141_clone1_6  | this study | China, Sichuan, Tianquan  | 30°14' | 102°30' | 2500 |                                     | KY310824/KY352197/KY311042               |
| <i>S. chintingensis</i>  | TMS; SICHUAN            | LC141_clone1_9  | this study | China, Sichuan, Tianquan  | 30°14' | 102°30' | 2500 |                                     | KY310825/KY352198/KY311043               |
| <i>S. glandulatus</i>    | THS; SICHUAN            | SC1_2014        | this study | China, Sichuan, Garzê     | 31°40' | 099°43' | 3457 | KY310770/KY310879/KY310931/KY310992 | KY310826/KY352199/KY311044               |
| <i>S. glandulatus</i>    | THS; SICHUAN            | SC2_2014        | this study | China, Sichuan, Garzê     | 29°47' | 100°25' | 3713 | KY310771/KY310880/KY310932/KY310993 | KY310827/KY352200/KY311045               |
| <i>S. glandulatus</i>    | THS; SICHUAN            | KQ61_2014       | this study | China, Sichuan, Garzê     | 29°47' | 100°25' | 3713 | KY310772/KY310881/KY310933/KY310994 | KY310828/KY352201/KY311046               |
| <i>S. glandulatus</i>    | THS; SICHUAN            | SH150516        | this study | China, Sichuan, Garzê     | 30°14' | 101°30' | 3526 | same as SC1_2014                    | KY310829/-/KY311047                      |
| <i>S. glandulatus</i>    | THS; SICHUAN            | SH150531        | this study | China, Sichuan, Kangding  | 30°02' | 101°32' | 3474 | KY310773/KY310882/KY310934/KY310995 | KY310830/KY311048                        |
| <i>S. glandulatus</i>    | THS; SICHUAN            | SH150557        | this study | China, Sichuan, Garzê     | 29°47' | 100°25' | 3713 | KY310774/KY310883/KY310935/KY310996 | KY310831/-/KY311049                      |

|                        |                    |              |            |                            |        |         |      |                                     |                            |
|------------------------|--------------------|--------------|------------|----------------------------|--------|---------|------|-------------------------------------|----------------------------|
| <i>S. glandulatus</i>  | THS; SICHUAN       | CIB_XM1188   | NCBI       | China, Sichuan, Xiangcheng | 29°09' | 99°56'  |      | EF397274/-/FJ945466/-               | --                         |
| <i>S. cf. mammatus</i> | THS; YUNNAN        | Yako01       | NCBI       | China, Yunnan              |        |         |      | EU180890/-/EU180932/EU180974        | --                         |
| <i>S. mammatus</i>     | THS; SICHUAN       | XM972        | NCBI       | China, Sichuan             | 30°01' | 101°28' |      | ---                                 | FJ945581/FJ945675/EF397300 |
| <i>S. mammatus</i>     | THS; SICHUAN       | LC045        | this study | China, Sichuan, Baiyu      | 31°01' | 99°15'  | 3494 | KY310775/KY310884/KY310964/KY310997 | KY310832/KY352202/KY311050 |
| <i>S. nepalensis</i>   | GH; WN (Kanjiroba) | NME_A2014/13 | this study | Nepal, Jumla               | 29°21' | 82°09'  | 3285 | KY310776/KY310885/KY310936/-        | KY310833/-/KY311051        |
| <i>S. nepalensis</i>   | GH; WN (Saipal)    | NME_A2018/13 | this study | Nepal, Chainpur            | 29°22' | 81°08'  | 3000 | KY310777/KY310886/KY310937/KY310998 | KY310834/KY352203/KY311052 |
| <i>S. nepalensis</i>   | GH; WN (Dhaulg. N) | A8-2012      | this study | Nepal                      | 28°42' | 82°55'  | 3340 | KY310778/KY310887/KY310938/KY310999 | KY310835/KY352204/KY311053 |
| <i>S. nepalensis</i>   | GH; WN (Dhaulg. N) | A9-2012      | this study | Nepal                      | 28°36' | 83°01'  | 3250 | KY310779/KY310888/KY310939/KY311000 | KY310836/KY352205/KY311054 |
| <i>S. nepalensis</i>   | GH; WN (Dhaulg. N) | A10-2012     | this study | Nepal                      | 28°36' | 83°01'  | 3250 | KY310780/KY310889/KY310940/KY311001 | KY310837/-/KY311055        |
| <i>S. nepalensis</i>   | GH; WN (Dhaulg. N) | A11-2012     | this study | Nepal                      | 28°36' | 83°01'  | 3250 | KY310781/KY310890/KY310941/KY311002 | same as A8-2012            |
| <i>S. nepalensis</i>   | GH; WN (Dhaulg. N) | A12-2012     | this study | Nepal                      | 28°36' | 83°01'  | 3250 | KY310782/KY310891/KY310942/KY311003 | KY310838/KY352207/KY311056 |
| <i>S. nepalensis</i>   | GH; WN (Dhaulg. N) | A13-2012     | this study | Nepal                      | 28°36' | 83°01'  | 3250 | KY310783/KY310892/KY310943/KY311004 | KY310839/KY352208/KY311057 |
| <i>S. nepalensis</i>   | GH; WN (Dhaulg. S) | A14-2012     | this study | Nepal                      | 28°30' | 83°02'  | 3073 | KY310784/KY310893/KY310944/KY311005 | KY310840/KY352209/KY311058 |
| <i>S. nepalensis</i>   | GH; WN (Dhaulg. N) | A15-2012     | this study | Nepal                      | 28°30' | 83°07'  | 2993 | KY310785/KY310894/KY310945/KY311006 | KY310841/KY352210/KY311059 |
| <i>S. nepalensis</i>   | GH; WN (Dhaulg. N) | A16-2012     | this study | Nepal                      | 28°30' | 83°07'  | 2993 | KY310786/KY310895/KY310946/KY311007 | ---                        |
| <i>S. nepalensis</i>   | GH; WN (Saipal)    | MS_Scut2     | this study | Nepal, Juphal              | 29°01' | 82°47'  | 4450 | KY310787/KY310896/KY310947/KY311008 | same as A2014-13           |
| <i>S. nepalensis</i>   | GH; WN (Saipal)    | MS_Scut5     | this study | Nepal, Dhaul Lake          | 29°21' | 82°23'  | 4449 | ---                                 | KY310842/KY352211/KY311060 |
| <i>S. nepalensis</i>   | GH; WN (Saipal)    | MS_Scut6     | this study | Nepal, Dhaul Lake          | 29°21' | 82°23'  | 4450 | KY310788/KY310897/KY310948/-        | KY310843/-/KY311061        |
| <i>S. nepalensis</i>   | GH; WN (Saipal)    | MS_Scut7     | this study | Nepal, Dhaul Lake          | 29°21' | 82°23'  | 4450 | KY310789/-/KY310949/-               | KY310844/-/KY311062        |
| <i>S. nepalensis</i>   | GH; WN (Saipal)    | MS_Scut8     | this study | Nepal, Dhaul Lake          | 29°21' | 82°23'  | 4450 | KY310790/-/KY310950/-               | KY310845/KY352212/KY311063 |
| <i>S. nepalensis</i>   | GH; WN (Saipal)    | MS_Scut9     | this study | Nepal, Dhaul Lake          | 29°21' | 82°23'  | 4450 | KY310791/KY310898/KY310951/KY311009 | -/KY352213/KY311064        |
| <i>S. nepalensis</i>   | GH; WN (Saipal)    | MS_Scut10    | this study | Nepal, Bumra               | 29°23' | 82°08'  | 2700 | KY310792/-/KY310952/-               | same as A2014-13           |
| <i>S. occidentalis</i> | PAKISTAN           | MS_PK1       | this study | Pakistan, Deosai Plains    | 34°59' | 75°15'  | 4100 | KY310793/-/KY310953/KY311010        | KY310846/KY352214/KY311065 |
| <i>S. occidentalis</i> | PAKISTAN           | MS_PK2       | this study | Pakistan, Deosai Plains    | 34°59' | 75°15'  | 4100 | KY310794/KY310899/KY310954/KY311011 | same as MS_PK1             |
| <i>S. occidentalis</i> | PAKISTAN           | MS_PK4       | this study | Pakistan, Deosai Plains    | 34°59' | 75°15'  | 4100 | same as MS_PK2                      | KY310847/KY352216/KY311066 |
| <i>S. occidentalis</i> | PAKISTAN           | MS_PK5       | this study | Pakistan, Deosai Plains    | 34°59' | 75°15'  | 4100 | KY310795/KY310900/KY310956/KY311012 | same as MS_PK1             |
| <i>S. occidentalis</i> | PAKISTAN           | MS_PK6       | this study | Pakistan, Deosai Plateau   | 35°2'  | 75°26'  | 4100 | KY310796/KY310901/KY310957/KY311013 | same as MS_PK4             |
| <i>S. sikkimensis</i>  | GH; EN (Arun)      | JS140523     | this study | Nepal, Kongma Danda        | 27°38' | 87°13'  | 3000 | KY310797/-/KY310958/KY311014        | KY310848/-/KY311067        |
| <i>S. sikkimensis</i>  | GH; EN (Arun)      | JS140524     | this study | Nepal, Kongma Danda        | 27°38' | 87°13'  | 3000 | KY310798/KY310902/KY310959/KY311015 | KY310849/-/KY311068        |
| <i>S. sikkimensis</i>  | GH; EN (Arun)      | JS140525     | this study | Nepal, Kongma Danda        | 27°38' | 87°13'  | 3000 | KY310799/KY310903/KY310960/KY311016 | KY310850/KY352219/KY311069 |
| <i>S. sikkimensis</i>  | GH; EN (Arun)      | JS140526     | this study | Nepal, Kongma Danda        | 27°38' | 87°13'  | 3000 | KY310800/-/KY310961/KY311017        | KY310851/KY352220/KY311070 |
| <i>S. sikkimensis</i>  | GH; EN (Arun)      | JS140527     | this study | Nepal, Kongma Danda        | 27°38' | 87°13'  | 3000 | same as JS140525                    | KY310852/-/KY311071        |
| <i>S. sikkimensis</i>  | GH; EN (Arun)      | JS140528     | this study | Nepal, Kongma Danda        | 27°38' | 87°13'  | 3000 | KY310801/KY310904/KY310963/KY311018 | KY310853/KY352221/KY311072 |
| <i>S. sikkimensis</i>  | GH; EN (DuK. W)    | Ne5-2013     | this study | Nepal, Surkie La           | 27°34' | 86°48'  | 2900 | KY310802/KY310905/KY310965/KY311019 | KY310854/KY352222/KY311073 |
| <i>S. sikkimensis</i>  | GH; EN (DuK. W)    | Ne6-2013     | this study | Nepal, Surkie La           | 27°34' | 86°48'  | 3000 | KY310803/KY310906/KY310966/KY311020 | KY310855/KY352223/KY311074 |
| <i>S. sikkimensis</i>  | GH; EN (DuK. W)    | Ne7-2013     | this study | Nepal, Surkie La           | 27°34' | 86°48'  | 3000 | KY310804/KY310907/KY310967/KY311021 | KY310856/KY352224/KY311075 |
| <i>S. sikkimensis</i>  | GH; EN (DuK. W)    | Ne8-2013     | this study | Nepal, Surkie La           | 27°35' | 86°50'  | 3550 | KY310805/KY310908/KY310968/KY311022 | KY310857/KY352225/KY311076 |
| <i>S. sikkimensis</i>  | GH; EN (DuK. E)    | Ne11-2013    | this study | Nepal, Taksindo            | 27°39' | 86°36'  | 3900 | KY310806/KY310909/KY310969/KY311023 | KY310858/KY352226/KY311077 |
| <i>S. sikkimensis</i>  | GH; EN (DuK. E)    | Ne14-2013    | this study | Nepal, Lamajura La         | 27°34' | 86°30'  | 3100 | KY310807/KY310910/KY310970/KY311024 | KY310859/-/KY311078        |
| <i>S. sikkimensis</i>  | GH; EN (DuK. E)    | Ne15-2013    | this study | Nepal, Lamajura La         | 27°34' | 86°30'  | 3400 | KY310808/KY310911/KY310971/KY311025 | same as Ne14-2013          |
| <i>S. liupanensis</i>  | THS; LIUPAN MTS    | FWR11        | NCBI       | China, Liupan Mountains    | 35°30' | 106°15' |      | -/KC140483/JX533792/-               | ---                        |
| <i>S. liupanensis</i>  | THS; LIUPAN MTS    | CPG8         | NCBI       | China, Liupan Mountains    | 35°22' | 106°18' |      | -/KC140479/JX533802/-               | ---                        |
| <i>S. liupanensis</i>  | THS; LIUPAN MTS    | CPG9         | NCBI       | China, Liupan Mountains    | 35°22' | 106°18' |      | -/KC140491/JX533804/-               | ---                        |

|                                |                  |                              |      |                                            |        |         |                       |                                     |     |
|--------------------------------|------------------|------------------------------|------|--------------------------------------------|--------|---------|-----------------------|-------------------------------------|-----|
| <i>S. liupanensis</i>          | THS; LIUPAN MTS  | SSR14                        | NCBI | China, Liupan Mountains                    | 35°21' | 105°19' | –/KC140478/JX533796/– | –/–                                 |     |
| <i>S. liupanensis</i>          | THS; LIUPAN MTS  | SSR23                        | NCBI | China, Liupan Mountains                    | 35°21' | 106°19' | –/KC140508/JX533795/– | –/–                                 |     |
| <i>S. liupanensis</i>          | THS; LIUPAN MTS  | DDR10                        | NCBI | China, Liupan Mountains                    | 35°20' | 106°20' | –/KC140474/JX533805/– | –/–                                 |     |
| <i>S. liupanensis</i>          | THS; LIUPAN MTS  | MXF11                        | NCBI | China, Liupan Mountains                    | 35°10' | 106°29' | –/KC140475/JX533806/– | –/–                                 |     |
| <i>S. liupanensis</i>          | THS; LIUPAN MTS  | MXF1                         | NCBI | China, Liupan Mountains                    | 35°10' | 106°29' | –/KC140513/JX533803/– | –/–                                 |     |
| <i>S. ningshanensis</i>        | TMS; SX (Henan)  | bys1                         | NCBI | China, Henan, Songxian Co.                 | 33°39' | 111°49' | 1675                  | –/KF757397/KF757340/–               | –/– |
| <i>S. ningshanensis</i>        | TMS; SX (Taibai) | hby1                         | NCBI | China, Shaanxi, Taibai Co                  | 33°52' | 107°31' | 1652                  | –/KF757402/KF757366/–               | –/– |
| <i>S. ningshanensis</i>        | TMS; SX (Taibai) | hby2                         | NCBI | China, Shaanxi, Taibai Co                  | 33°52' | 107°31' | 1652                  | –/KC140559/KC140561/–               | –/– |
| <i>S. ningshanensis</i>        | TMS; SX (Taibai) | hby3                         | NCBI | China, Shaanxi, Taibai Co                  | 33°52' | 107°31' | 1652                  | –/KC140560/KC140562/–               | –/– |
| <i>S. ningshanensis</i>        | TMS; SX (Taibai) | hby7                         | NCBI | China, Shaanxi, Taibai Co                  | 33°52' | 107°31' | 1652                  | –/KF757412/KF757371/–               | –/– |
| <i>S. ningshanensis</i>        | TMS; SX (Taibai) | hby13                        | NCBI | China, Shaanxi, Taibai Co                  | 33°52' | 107°31' | 1652                  | –/KF757405/KF757342/–               | –/– |
| <i>S. ningshanensis</i>        | TMS; SX (Taibai) | hby19                        | NCBI | China, Shaanxi, Taibai Co                  | 33°52' | 107°31' | 1652                  | –/KF757408/KF757344/–               | –/– |
| <i>S. ningshanensis</i>        | TMS; SX (Taibai) | lfy2                         | NCBI | China, Shaanxi, Foping Co                  | 33°40' | 107°51' | 2047                  | –/KF757420/KF757377/–               | –/– |
| <i>S. ningshanensis</i>        | TMS; SX (Taibai) | lfy5                         | NCBI | China, Shaanxi, Foping Co                  | 33°40' | 107°51' | 2047                  | –/KF757422/KF757378/–               | –/– |
| <i>S. ningshanensis</i>        | TMS; SX (Taibai) | lfy17                        | NCBI | China, Shaanxi, Foping Co                  | 33°40' | 107°51' | 2047                  | –/KF757419/KF757376/–               | –/– |
| <i>S. ningshanensis</i>        | TMS; SX (Nings.) | nsc1                         | NCBI | China, Shaanxi, Ningshan Co                | 33°28' | 108°31' | 2000                  | –/KF757427/KF757355/–               | –/– |
| <i>S. ningshanensis</i>        | TMS; SX (Nings.) | nsc2                         | NCBI | China, Shaanxi, Ningshan Co                | 33°28' | 108°31' | 2000                  | –/KF757433/KF757386/–               | –/– |
| <i>S. ningshanensis</i>        | TMS; SX (Nings.) | nsc10                        | NCBI | China, Shaanxi, Ningshan Co                | 33°28' | 108°31' | 2000                  | –/KF757428/KF757356/–               | –/– |
| <i>S. ningshanensis</i>        | TMS; SX (Henan)  | ljs18                        | NCBI | China, Henan, Luanchuan Co.                | 33°43' | 111°37' | 1590                  | –/KF757425/KF757353/–               | –/– |
| <i>S. ningshanensis</i>        | TMS; SX (Henan)  | srs15                        | NCBI | China, Henan, Lushan Co.                   | 33°43' | 112°15' | 1642                  | –/KF757437/KF757362/–               | –/– |
| <i>S. sp.</i>                  | THS; YUNNAN      | CAS228188                    | NCBI | China, Yunnan                              | 27°50' | 98°50'  |                       | EU180889/–/EU180931/EU180973        | –/– |
| <i>S. tuberculatus</i>         | THS; SICHUAN     | CIBXM988                     | NCBI | China, Sichuan                             | 28°31' | 102°30' |                       | EF397278/–/FJ945493/–               | –/– |
| <i>Alytes obstetricans</i>     |                  |                              | NCBI |                                            |        |         |                       | mt-genome: NC_006688                | –/– |
| <i>Bombina bombina</i>         |                  |                              | NCBI |                                            |        |         |                       | mt-genome: JX893172                 | –/– |
| <i>Discoglossus galganoi</i>   |                  |                              | NCBI |                                            |        |         |                       | mt-genome: AY585339                 | –/– |
| <i>Leptobranchium boringii</i> |                  | SCUM120630                   | NCBI | China, Sichuan                             |        |         |                       | mt-genome: NC_024427                | –/– |
| <i>Oreolalax chuanbeiensis</i> |                  | CIBXM074/<br>DQR_Pingwu_001J | NCBI | China, Sichuan, Mao Xian Co/<br>Pingwu Co. | 31°45' | 104°07' |                       | EF397266/–/EU180929/EU180971        | –/– |
| <i>Oreolalax omeimontis</i>    |                  | CIBXM439/<br>KIZOO96002      | NCBI | China, Sichuan, Emei Mt.                   | 29°33' | 103°22' |                       | EF397264/–/EU180928/EU180970        | –/– |
| <i>Megophrys sp.</i>           |                  |                              | NCBI |                                            |        |         |                       | mt-genome: KT601071                 | –/– |
| <i>Pelobates cultripes</i>     |                  |                              | NCBI | Spain, Madrid                              |        |         |                       | mt-genome: AJ871086                 | –/– |
| <i>Pelodytes punctatus</i>     |                  |                              | NCBI |                                            |        |         |                       | mt-genome: NC_020000                | –/– |
| <i>Pipa pipa</i>               |                  |                              | NCBI |                                            |        |         |                       | mt-genome: GQ244477                 | –/– |
| <i>Rhinophrynus dorsalis</i>   |                  |                              | NCBI |                                            |        |         |                       | mt-genome: JX564892                 | –/– |
| <i>Scaphiopus</i>              |                  |                              | NCBI |                                            |        |         |                       | AB612078/AB612075/JX564894/JX564894 | –/– |
| <i>col</i>                     |                  |                              |      |                                            |        |         |                       |                                     |     |
| <i>S. boulengeri</i>           | –; C-TIBET       | KIZ08195                     | NCBI | China, TAR                                 |        |         |                       | JN700837 <sup>#</sup>               |     |
| <i>S. boulengeri</i>           | –; E-TIBET       | KIZ06712                     | NCBI | China, TAR, Bomi                           |        |         |                       | KU243064 <sup>*</sup>               |     |
| <i>S. boulengeri</i>           | –; GANSU         | Jone1                        | NCBI | China, Gansu                               |        |         |                       | KJ082073 <sup>‡</sup>               |     |
| <i>S. gongshanensis</i>        | –; YUNNAN        | CIB20070717001               | NCBI | China, Yunnan, Gongshan                    | 27°42' | 98°30'  |                       | KU243062 <sup>#</sup>               |     |
| <i>S. gongshanensis</i>        | –; YUNNAN        | CIB20070717002               | NCBI | China, Yunnan, Gongshan                    | 27°42' | 98°30'  |                       | KU243063 <sup>#</sup>               |     |
| <i>S. julongensis</i>          | –; SICHUAN       | KIZ045055                    | NCBI | China, Sichuan, Ganzi                      |        |         |                       | KU243066 <sup>#</sup>               |     |
| <i>S. liupanensis</i>          | –; LIUPAN MTS    | FWR11                        | NCBI | China, NHAR                                |        |         |                       | KC140483 <sup>†</sup>               |     |

|                         |               |           |      |                             |                       |
|-------------------------|---------------|-----------|------|-----------------------------|-----------------------|
| <i>S. liupanensis</i>   | –; LIUPAN MTS | CPG8      | NCBI | China, NHAR                 | KC140479 <sup>†</sup> |
| <i>S. liupanensis</i>   | –; LIUPAN MTS | DDR10     | NCBI | China, NHAR                 | KC140474 <sup>†</sup> |
| <i>S. nyingchiensis</i> | –; E-TIBET    | KIZ017459 | NCBI | China, TAR, Nyingchi, Medog | KU243056*             |
| <i>S. ningshanensis</i> | –; SX         | hby19     | NCBI | China, Shaanxi, Taibai Co   | KF757408 <sup>‡</sup> |
| <i>S. ningshanensis</i> | –; SX         | lfy17     | NCBI | China, Shaanxi, Foping Co   | KF757419 <sup>‡</sup> |
| <i>S. ningshanensis</i> | –; SX         | nsc1      | NCBI | China, Shaanxi, Ningshan Co | KF757427 <sup>‡</sup> |
| <i>S. ningshanensis</i> | –; SX         | srs15     | NCBI | China, Henan, Lushan Co     | KF757437 <sup>‡</sup> |
| <i>S. sikimensis</i>    | –; YADONG     | KIZ011127 | NCBI | China, TAR, Yadong          | KU243058              |
| <i>S. sikimensis</i>    | –; YADONG     | KIZ07371  | NCBI | China, TAR, Yadong          | KU243059              |
| <i>S. spinosus</i>      | –; E-TIBET    | KIZ011114 | NCBI | China, TAR, Nyingchi, Medog | KU243053              |
| <i>S. wuguanfui</i>     | –; E-TIBET    | KIZ011101 | NCBI | China, TAR, Nyingchi, Medog | KU243060              |

<sup>#</sup>Che, J. et al. Universal COI primers for DNA barcoding amphibians. *Molecular Ecology Resources* **12**, 247–58 (2012).

\*Jiang, K. et al. A new species of the genus *Scutigera* (Anura: Megophryidae) from Medog of southeastern Tibet, China. *Zool Res.* **37**, 21–30 (2016).

<sup>‡</sup>Meng, H., Li, X. & Qiao, P. Population structure, historical biogeography and demographic history of the alpine toad *Scutigera ningshanensis* in the Tsinling Mountains of Central China. *PLoS One* **9**, e100729 (2014).

<sup>†</sup>Su, L.-N., Meng, H.-Z. & Li, X.-C. Genetic diversity and historical demography of the narrow-range endemic Alpine toad, *Scutigera liupanensis*, in the Liupan Mountains of central China. *Genetics and Molecular Research* **14**, 4865–78 (2015).

**Table S6. Primer and annealing temperature used for DNA amplification (amp) and sequencing (seq).**

| <i>gene</i>                                           | <i>Primer</i>      |           | <i>Direction</i> | <i>Sequence 5' → 3'</i>       | <i>annealing</i> | <i>Reference</i> |
|-------------------------------------------------------|--------------------|-----------|------------------|-------------------------------|------------------|------------------|
| <i>16S ribosomal RNA (16S)</i>                        | L02510             | amp + seq | forward          | CGCCTGTTTAYCAAAAACAT          | 52°, 120 sec     | [1]              |
|                                                       | H03063             | amp + seq | reverse          | CTCCGGTTTGAAGCTCAGATC         | 52°, 120 sec     | [2]              |
| <i>cytochrome oxidase subunit 1 (co1)</i>             | Chmf4              | amp + seq | forward          | TYTCWACWAAYCAYAAAGAYATCGG     | 50°, 60 sec      | [3]              |
|                                                       | Chmr4              | amp + seq | reverse          | ACYTCRGGRTGRCCRAARAATCA       | 50°, 60 sec      | [3]              |
| <i>cytochrome b (cytb)</i>                            | SCU_L14841         | amp + seq | forward          | CTTCCATCCAACATCTCAGCATGATGAAA | 50°, 90 sec      | [4]              |
|                                                       | SCU5               | amp + seq | reverse          | ACAAGACCAATGCTTTAGTTAAGCTAC   | 50°, 90 sec      | [5]              |
| <i>dehydrogenase subunit 4 (nd4)</i>                  | nd4_1-F            | amp + seq | forward          | CTATTCTTCTAAAATTAGGGGGATATGG  | 50°, 60 sec      | this study       |
|                                                       | nd4_1-R            | amp + seq | reverse          | GGATTACTATTTTCCTTTAAAAGCCG    | 50°, 60 sec      | this study       |
| <i>beta-Fibrinogen intron 7 (bfb7)</i>                | BFX-F1             | amp + seq | forward          | ACCCAAACTACAGTATGATGCC        | 57°, 60 sec      | [6]              |
|                                                       | BFX-R1             | amp + seq | reverse          | TTCCTCACCACCTTACTTCCT         | 57°, 60 sec      | [6]              |
| <i>cyclin B2 gene intron 3 (ccnb2)</i>                | ccnb_SF            | amp + seq | forward          | GAATGTGGACTCTAATGGAGAAG       | 57°, 60 sec      | [6]              |
|                                                       | ccnb_SR1           | amp + seq | reverse          | TGGAGGAATAGCCGCTTTATGC        | 57°, 60 sec      | [6]              |
|                                                       | Amp-RAG1_F         | amp       | forward          | AGCTGCAGYCARTACCAYAAARATGTA   | 56°, 90 sec      | [7]              |
| <i>recombination activating protein 1 gene (rag1)</i> | Amp-RAG1_R         | amp       | reverse          | GCAAAGTTTCCGTTTCATTCAT        | 56°, 90 sec      | [8]              |
|                                                       | rag1_Scut_Intern_F | seq       | forward          | TGTCAAAGCCACAAGTGGAAAG        |                  | this study       |
|                                                       | rag1_Scut_Intern_F | seq       | forward          | TCATTTTCTTCCTGAGGTGTTTGTGTC   |                  | this study       |

1. Palumbi, S. R. Nucleic Acids II: the polymerase chain reaction in *Molecular Systematics* (eds Hillis, D.M., Moritz, C. & Mable, B. K.) 205–47 (Sinauer Associates, 1996).
2. Rassmann, K. Evolutionary age of the Galapagos iguanas predates the age of the present Galapagos Islands. *Molecular Phylogenetics and Evolution* **7**, 158–72 (1997).
3. Che, J. et al. Universal COI primers for DNA barcoding amphibians. *Molecular Ecology Resources* **12**, 247–58 (2012).
4. Kocher, T. D. et al. Dynamics of mitochondrial DNA evolution in animals: amplification and sequencing with conserved primers. *Proceedings of the National Academy of Sciences USA* **86**, 6196–200 (1989).
5. Li, R. et al. Rivers as barriers for high elevation amphibians: a phylogeographic analysis of the alpine stream frog of the Hengduan. *Journal of Zoology* **277**, 309–16 (2009).
6. Chen, W., Bi, K. & Fu, J. Frequent mitochondrial gene introgression among high elevation Tibetan megophryid frogs revealed by conflicting genegenalogies. *Molecular Ecology* **18**, 2856–76 (2009).
7. Mauro, D. S., Gower, D. J., Oommen, O. V., Wilkinson, M. & Zardoya, R. Phylogeny of caecilian amphibians (Gymnophiona) based on complete mitochondrial genomes and nuclear RAG1. *Molecular Phylogenetics and Evolution* **33**, 413–27 (2004).
8. Fu, J., Weadick, C. J. & Bi, K. A phylogeny of the high-elevation Tibetan megophryid frogs and evidence for the multiple origins of reversed sexual size dimorphism. *Journal of Zoology* **273**, 315–25 (2007).
